# Supplementary material for: Nest-Building Effort is Not An Indicator of Male Quality In Bonelli’s Eagles, Aquila fasciata
Source: Research Square preprint supplement (doi:10.21203/rs.3.rs-1011301/v1), 2021-10-27
Supplement: Supplementary file 1 [file 1977572670e8b00358f4b2bc.xlsx]

## Sheet: Nest-building behaviour
TERRI	WEEK	SEX	COUP	IND	EXPER	CONTROL	CONTRH	NESTMAT	FRESH	HARD	CHICKS	BQI	YEAR
Te36	-16	1	4	36M01	5	600	10	5	1	4	2	1.92	2016
Te36	-16	2	4	36H01	5	600	10	5	3	2	2	1.92	2016
Te36	-15	1	4	36M01	5	600	10	0	0	0	2	1.92	2016
Te36	-15	2	4	36H01	5	600	10	0	0	0	2	1.92	2016
Te36	-14	1	4	36M01	5	660	11	0	0	0	2	1.92	2016
Te36	-14	2	4	36H01	5	660	11	0	0	0	2	1.92	2016
Te36	-13	1	4	36M01	5	660	11	0	0	0	2	1.92	2016
Te36	-13	2	4	36H01	5	660	11	0	0	0	2	1.92	2016
Te36	-12	1	3	36M01	5	600	10	0	0	0	2	1.92	2016
Te36	-12	2	3	36H01	5	600	10	1	1	0	2	1.92	2016
Te36	-11	1	3	36M01	5	600	10	11	1	10	2	1.92	2016
Te36	-11	2	3	36H01	5	600	10	5	0	5	2	1.92	2016
Te36	-10	1	3	36M01	5	600	10	6	4	2	2	1.92	2016
Te36	-10	2	3	36H01	5	600	10	6	0	6	2	1.92	2016
Te36	-9	1	3	36M01	5	600	10	0	0	0	2	1.92	2016
Te36	-9	2	3	36H01	5	600	10	0	0	0	2	1.92	2016
Te36	-8	1	2	36M01	5	600	10	0	0	0	2	1.92	2016
Te36	-8	2	2	36H01	5	600	10	1	1	0	2	1.92	2016
Te36	-7	1	2	36M01	5	600	10	1	0	1	2	1.92	2016
Te36	-7	2	2	36H01	5	600	10	1	0	1	2	1.92	2016
Te36	-6	1	2	36M01	5	600	10	10	3	7	2	1.92	2016
Te36	-6	2	2	36H01	5	600	10	7	0	7	2	1.92	2016
Te36	-5	1	2	36M01	5	600	10	0	0	0	2	1.92	2016
Te36	-5	2	2	36H01	5	600	10	0	0	0	2	1.92	2016
Te36	-4	1	1	36M01	5	600	10	0	0	0	2	1.92	2016
Te36	-4	2	1	36H01	5	600	10	0	0	0	2	1.92	2016
Te36	-3	1	1	36M01	5	600	10	0	0	0	2	1.92	2016
Te36	-3	2	1	36H01	5	600	10	0	0	0	2	1.92	2016
Te36	-2	1	1	36M01	5	660	11	5	5	0	2	1.92	2016
Te36	-2	2	1	36H01	5	660	11	1	1	0	2	1.92	2016
Te36	-1	1	1	36M01	5	660	11	1	1	0	2	1.92	2016
Te36	-1	2	1	36H01	5	660	11	0	0	0	2	1.92	2016
Al01	-13	1	4	01M88	11	690	11.5	0	0	0	2	2.08	2011
Al01	-13	2	4	01H88	13	690	11.5	0	0	0	2	2.08	2011
Al01	-10	1	3	01M88	11	680	11.33	0	0	0	2	2.08	2011
Al01	-10	2	3	01H88	13	680	11.33	0	0	0	2	2.08	2011
Al01	-7	1	2	01M88	11	665	11.08	0	0	0	2	2.08	2011
Al01	-7	2	2	01H88	13	665	11.08	0	0	0	2	2.08	2011
Al01	-3	1	1	01M88	11	645	10.75	2	2	0	2	2.08	2011
Al01	-3	2	1	01H88	13	645	10.75	1	1	0	2	2.08	2011
Al01	-2	1	1	01M88	11	655	10.91	4	3	1	2	2.08	2011
Al01	-2	2	1	01H88	13	655	10.91	3	2	1	2	2.08	2011
Al01	-1	1	1	01M88	11	640	10.66	3	3	0	2	2.08	2011
Al01	-1	2	1	01H88	13	640	10.66	3	2	1	2	2.08	2011
Te05	-15	1	4	05M01	2	680	11.33	0	0	0	0	0	2012
Te05	-15	2	4	05H01	9	680	11.33	0	0	0	0	0	2012
Te05	-14	1	4	05M01	2	660	11	0	0	0	0	0	2012
Te05	-14	2	4	05H01	9	660	11	0	0	0	0	0	2012
Te05	-13	1	4	05M01	2	660	11	10	9	1	0	0	2012
Te05	-13	2	4	05H01	9	660	11	24	18	6	0	0	2012
Te05	-12	1	3	05M01	2	630	10.5	1	1	0	0	0	2012
Te05	-12	2	3	05H01	9	630	10.5	2	1	1	0	0	2012
Te05	-11	1	3	05M01	2	655	10.91	0	0	0	0	0	2012
Te05	-11	2	3	05H01	9	655	10.91	2	2	0	0	0	2012
Te05	-10	1	3	05M01	2	625	10.41	0	0	0	0	0	2012
Te05	-10	2	3	05H01	9	625	10.41	0	0	0	0	0	2012
Te05	-9	1	3	05M01	2	635	10.58	0	0	0	0	0	2012
Te05	-9	2	3	05H01	9	635	10.58	0	0	0	0	0	2012
Te05	-8	1	2	05M01	2	615	10.25	0	0	0	0	0	2012
Te05	-8	2	2	05H01	9	615	10.25	0	0	0	0	0	2012
Te05	-7	1	2	05M01	2	585	9.75	16	16	0	0	0	2012
Te05	-7	2	2	05H01	9	585	9.75	19	17	2	0	0	2012
Te05	-6	1	2	05M01	2	660	11	0	0	0	0	0	2012
Te05	-6	2	2	05H01	9	660	11	0	0	0	0	0	2012
Te05	-5	1	2	05M01	2	645	10.75	2	2	0	0	0	2012
Te05	-5	2	2	05H01	9	645	10.75	2	2	0	0	0	2012
Te05	-4	1	1	05M01	2	645	10.75	2	2	0	0	0	2012
Te05	-4	2	1	05H01	9	645	10.75	1	1	0	0	0	2012
Te05	-3	1	1	05M01	2	645	10.75	0	0	0	0	0	2012
Te05	-3	2	1	05H01	9	645	10.75	0	0	0	0	0	2012
Te05	-2	1	1	05M01	2	660	11	0	0	0	0	0	2012
Te05	-2	2	1	05H01	9	660	11	1	1	0	0	0	2012
Te05	-1	1	1	05M01	2	660	11	4	3	1	0	0	2012
Te05	-1	2	1	05H01	9	660	11	11	10	1	0	0	2012
Te11	-12	1	3	11M01	11	675	11.25	0	0	0	0	0	2012
Te11	-12	2	3	11H01	11	675	11.25	0	0	0	0	0	2012
Te11	-11	1	3	11M01	11	675	11.25	0	0	0	0	0	2012
Te11	-11	2	3	11H01	11	675	11.25	0	0	0	0	0	2012
Te11	-10	1	3	11M01	11	660	11	0	0	0	0	0	2012
Te11	-10	2	3	11H01	11	660	11	0	0	0	0	0	2012
Te11	-9	1	3	11M01	11	645	10.75	0	0	0	0	0	2012
Te11	-9	2	3	11H01	11	645	10.75	0	0	0	0	0	2012
Te11	-8	1	2	11M01	11	660	11	2	1	1	0	0	2012
Te11	-8	2	2	11H01	11	660	11	1	1	0	0	0	2012
Te11	-7	1	2	11M01	11	635	10.58	0	0	0	0	0	2012
Te11	-7	2	2	11H01	11	635	10.58	0	0	0	0	0	2012
Te11	-6	1	2	11M01	11	630	10.5	0	0	0	0	0	2012
Te11	-6	2	2	11H01	11	630	10.5	0	0	0	0	0	2012
Te11	-5	1	2	11M01	11	630	10.5	0	0	0	0	0	2012
Te11	-5	2	2	11H01	11	630	10.5	0	0	0	0	0	2012
Te11	-4	1	1	11M01	11	630	10.5	2	1	1	0	0	2012
Te11	-4	2	1	11H01	11	630	10.5	3	0	3	0	0	2012
Te11	-3	1	1	11M01	11	645	10.75	6	4	2	0	0	2012
Te11	-3	2	1	11H01	11	645	10.75	3	2	1	0	0	2012
Te11	-2	1	1	11M01	11	590	9.83	0	0	0	0	0	2012
Te11	-2	2	1	11H01	11	590	9.83	2	2	0	0	0	2012
Te25	-14	1	4	25M01	3	670	11.16	0	0	0	1	0.97	2012
Te25	-14	2	4	25H01	9	670	11.16	0	0	0	1	0.97	2012
Te25	-13	1	4	25M01	3	645	10.75	1	0	1	1	0.97	2012
Te25	-13	2	4	25H01	9	645	10.75	2	1	1	1	0.97	2012
Te25	-12	1	3	25M01	3	665	11.08	0	0	0	1	0.97	2012
Te25	-12	2	3	25H01	9	665	11.08	0	0	0	1	0.97	2012
Te25	-11	1	3	25M01	3	645	10.75	0	0	0	1	0.97	2012
Te25	-11	2	3	25H01	9	645	10.75	0	0	0	1	0.97	2012
Te25	-9	1	3	25M01	3	645	10.75	6	0	6	1	0.97	2012
Te25	-9	2	3	25H01	9	645	10.75	8	3	5	1	0.97	2012
Te25	-8	1	2	25M01	3	630	10.5	0	0	0	1	0.97	2012
Te25	-8	2	2	25H01	9	630	10.5	0	0	0	1	0.97	2012
Te25	-7	1	2	25M01	3	640	10.66	3	0	3	1	0.97	2012
Te25	-7	2	2	25H01	9	640	10.66	3	1	2	1	0.97	2012
Te25	-6	1	2	25M01	3	635	10.58	0	0	0	1	0.97	2012
Te25	-6	2	2	25H01	9	640	10.66	0	0	0	1	0.97	2012
Te25	-5	1	2	25M01	3	660	11	1	1	0	1	0.97	2012
Te25	-5	2	2	25H01	9	660	11	1	1	0	1	0.97	2012
Te25	-3	1	1	25M01	3	660	11	2	2	0	1	0.97	2012
Te25	-3	2	1	25H01	9	660	11	2	2	0	1	0.97	2012
Te25	-2	1	1	25M01	3	655	10.91	2	2	0	1	0.97	2012
Te25	-2	2	1	25H01	9	655	10.91	2	2	0	1	0.97	2012
Te25	-1	1	1	25M01	3	660	11	1	0	1	1	0.97	2012
Te25	-1	2	1	25H01	9	660	11	2	2	0	1	0.97	2012
Te21	-13	1	4	21M01	11	665	11.08	0	0	0	2	1.94	2012
Te21	-13	2	4	21H01	11	665	11.08	0	0	0	2	1.94	2012
Te21	-12	1	3	21M01	11	660	11	10	6	4	2	1.94	2012
Te21	-12	2	3	21H01	11	660	11	6	2	4	2	1.94	2012
Te21	-11	1	3	21M01	11	450	7.5	0	0	0	2	1.94	2012
Te21	-11	2	3	21H01	11	450	7.5	0	0	0	2	1.94	2012
Te21	-10	1	3	21M01	11	630	10.5	0	0	0	2	1.94	2012
Te21	-10	2	3	21H01	11	630	10.5	0	0	0	2	1.94	2012
Te21	-9	1	3	21M01	11	630	10.5	0	0	0	2	1.94	2012
Te21	-9	2	3	21H01	11	630	10.5	0	0	0	2	1.94	2012
Te21	-8	1	2	21M01	11	630	10.5	3	3	0	2	1.94	2012
Te21	-8	2	2	21H01	11	630	10.5	3	2	1	2	1.94	2012
Te21	-7	1	2	21M01	11	570	9.5	1	0	1	2	1.94	2012
Te21	-7	2	2	21H01	11	570	9.5	0	0	0	2	1.94	2012
Te21	-6	1	2	21M01	11	620	10.33	1	0	1	2	1.94	2012
Te21	-6	2	2	21H01	11	620	10.33	3	3	0	2	1.94	2012
Te21	-5	1	2	21M01	11	630	10.5	1	0	1	2	1.94	2012
Te21	-5	2	2	21H01	11	630	10.5	0	0	0	2	1.94	2012
Te21	-4	1	1	21M01	11	645	10.75	0	0	0	2	1.94	2012
Te21	-4	2	1	21H01	11	645	10.75	0	0	0	2	1.94	2012
Te21	-3	1	1	21M01	11	645	10.75	0	0	0	2	1.94	2012
Te21	-3	2	1	21H01	11	645	10.75	0	0	0	2	1.94	2012
Te21	-2	1	1	21M01	11	650	10.83	4	2	2	2	1.94	2012
Te21	-2	2	1	21H01	11	650	10.83	2	2	0	2	1.94	2012
Te21	-1	1	1	21M01	11	645	10.75	1	1	0	2	1.94	2012
Te21	-1	2	1	21H01	11	645	10.75	1	1	0	2	1.94	2012
Te06	-11	1	3	06M01	6	670	11.16	0	0	0	2	1.94	2012
Te06	-11	2	3	06H01	5	670	11.16	0	0	0	2	1.94	2012
Te06	-10	1	3	06M01	6	660	11	1	0	1	2	1.94	2012
Te06	-10	2	3	06H01	5	660	11	1	0	1	2	1.94	2012
Te06	-9	1	3	06M01	6	630	10.5	0	0	0	2	1.94	2012
Te06	-9	2	3	06H01	5	630	10.5	0	0	0	2	1.94	2012
Te06	-8	1	2	06M01	6	645	10.75	0	0	0	2	1.94	2012
Te06	-8	2	2	06H01	5	645	10.75	0	0	0	2	1.94	2012
Te06	-7	1	2	06M01	6	645	10.75	0	0	0	2	1.94	2012
Te06	-7	2	2	06H01	5	645	10.75	0	0	0	2	1.94	2012
Te06	-6	1	2	06M01	6	625	10.41	0	0	0	2	1.94	2012
Te06	-6	2	2	06H01	5	625	10.41	0	0	0	2	1.94	2012
Te06	-5	1	2	06M01	6	630	10.5	0	0	0	2	1.94	2012
Te06	-5	2	2	06H01	5	630	10.5	0	0	0	2	1.94	2012
Te06	-4	1	1	06M01	6	645	10.75	0	0	0	2	1.94	2012
Te06	-4	2	1	06H01	5	645	10.75	0	0	0	2	1.94	2012
Te06	-2	1	1	06M01	6	645	10.75	0	0	0	2	1.94	2012
Te06	-2	2	1	06H01	5	645	10.75	0	0	0	2	1.94	2012
Te06	-1	1	1	06M01	6	620	10.33	0	0	0	2	1.94	2012
Te06	-1	2	1	06H01	5	620	10.33	1	1	0	2	1.94	2012
Te24	-16	1	4	24M01	9	735	12.25	0	0	0	2	2.08	2011
Te24	-16	2	4	24H01	9	735	12.25	0	0	0	2	2.08	2011
Te24	-14	1	4	24M01	9	630	10.5	0	0	0	2	2.08	2011
Te24	-14	2	4	24H01	9	630	10.5	0	0	0	2	2.08	2011
Te24	-12	1	3	24M01	9	600	10	1	1	0	2	2.08	2011
Te24	-12	2	3	24H01	9	600	10	2	1	1	2	2.08	2011
Te24	-10	1	3	24M01	9	600	10	0	0	0	2	2.08	2011
Te24	-10	2	3	24H01	9	600	10	0	0	0	2	2.08	2011
Te24	-7	1	2	24M01	9	600	10	0	0	0	2	2.08	2011
Te24	-7	2	2	24H01	9	600	10	0	0	0	2	2.08	2011
Te24	-6	1	2	24M01	9	600	10	0	0	0	2	2.08	2011
Te24	-6	2	2	24H01	9	600	10	0	0	0	2	2.08	2011
Te24	-5	1	2	24M01	9	630	10.5	0	0	0	2	2.08	2011
Te24	-5	2	2	24H01	9	630	10.5	0	0	0	2	2.08	2011
Te24	-4	1	1	24M01	9	615	10.25	0	0	0	2	2.08	2011
Te24	-4	2	1	24H01	9	615	10.25	0	0	0	2	2.08	2011
Te24	-3	1	1	24M01	9	645	10.75	0	0	0	2	2.08	2011
Te24	-3	2	1	24H01	9	645	10.75	0	0	0	2	2.08	2011
Te24	-2	1	1	24M01	9	615	10.25	0	0	0	2	2.08	2011
Te24	-2	2	1	24H01	9	615	10.25	0	0	0	2	2.08	2011
Te24	-1	1	1	24M01	9	660	11	0	0	0	2	2.08	2011
Te24	-1	2	1	24H01	9	660	11	0	0	0	2	2.08	2011
Te18	-14	1	4	18M01	14	720	12	3	3	0	2	2.08	2011
Te18	-14	2	4	18H01	14	720	12	1	0	1	2	2.08	2011
Te18	-12	1	3	18M01	14	660	11	2	0	2	2	2.08	2011
Te18	-12	2	3	18H01	14	660	11	1	0	1	2	2.08	2011
Te18	-10	1	3	18M01	14	240	4	0	0	0	2	2.08	2011
Te18	-10	2	3	18H01	14	240	4	0	0	0	2	2.08	2011
Te18	-8	1	2	18M01	14	615	10.25	0	0	0	2	2.08	2011
Te18	-8	2	2	18H01	14	615	10.25	0	0	0	2	2.08	2011
Te18	-6	1	2	18M01	14	600	10	3	0	3	2	2.08	2011
Te18	-6	2	2	18H01	14	600	10	2	0	2	2	2.08	2011
Te18	-5	1	2	18M01	14	600	10	2	2	0	2	2.08	2011
Te18	-5	2	2	18H01	14	600	10	0	0	0	2	2.08	2011
Te18	-4	1	1	18M01	14	620	10.33	4	2	2	2	2.08	2011
Te18	-4	2	1	18H01	14	620	10.33	3	2	1	2	2.08	2011
Te18	-3	1	1	18M01	14	615	10.25	1	1	0	2	2.08	2011
Te18	-3	2	1	18H01	14	615	10.25	0	0	0	2	2.08	2011
Te18	-2	1	1	18M01	14	650	10.83	2	2	0	2	2.08	2011
Te18	-2	2	1	18H01	14	650	10.83	2	2	0	2	2.08	2011
Te18	-1	1	1	18M01	14	655	10.91	4	3	1	2	2.08	2011
Te18	-1	2	1	18H01	14	655	10.91	0	0	0	2	2.08	2011
Te13	-14	1	4	13M01	10	675	11.25	0	0	0	2	2.08	2011
Te13	-14	2	4	13H01	10	675	11.25	0	0	0	2	2.08	2011
Te13	-10	1	3	13M01	10	615	10.25	0	0	0	2	2.08	2011
Te13	-10	2	3	13H01	10	615	10.25	0	0	0	2	2.08	2011
Te13	-8	1	2	13M01	10	570	9.5	0	0	0	2	2.08	2011
Te13	-8	2	2	13H01	10	570	9.5	0	0	0	2	2.08	2011
Te13	-6	1	2	13M01	10	570	9.5	0	0	0	2	2.08	2011
Te13	-6	2	2	13H01	10	570	9.5	4	4	0	2	2.08	2011
Te13	-5	1	2	13M01	10	655	10.91	8	6	2	2	2.08	2011
Te13	-5	2	2	13H01	10	655	10.91	9	6	3	2	2.08	2011
Te13	-4	1	1	13M01	10	630	10.5	0	0	0	2	2.08	2011
Te13	-4	2	1	13H01	10	630	10.5	0	0	0	2	2.08	2011
Te13	-3	1	1	13M01	10	620	10.33	10	7	3	2	2.08	2011
Te13	-3	2	1	13H01	10	620	10.33	11	10	1	2	2.08	2011
Te13	-2	1	1	13M01	10	645	10.75	4	4	0	2	2.08	2011
Te13	-2	2	1	13H01	10	645	10.75	5	5	0	2	2.08	2011
Te13	-1	1	1	13M01	10	675	11.25	1	1	0	2	2.08	2011
Te13	-1	2	1	13H01	10	675	11.25	1	1	0	2	2.08	2011
Te04	-15	1	4	04M01	14	690	11.5	0	0	0	2	2.08	2011
Te04	-15	2	4	04H01	9	690	11.5	0	0	0	2	2.08	2011
Te04	-13	1	4	04M01	14	630	10.5	0	0	0	2	2.08	2011
Te04	-13	2	4	04H01	9	630	10.5	1	0	1	2	2.08	2011
Te04	-10	1	3	04M01	14	610	10.16	0	0	0	2	2.08	2011
Te04	-10	2	3	04H01	9	610	10.16	0	0	0	2	2.08	2011
Te04	-9	1	3	04M01	14	600	10	0	0	0	2	2.08	2011
Te04	-9	2	3	04H01	9	600	10	1	0	1	2	2.08	2011
Te04	-7	1	2	04M01	14	605	10.08	2	1	1	2	2.08	2011
Te04	-7	2	2	04H01	9	605	10.08	5	3	2	2	2.08	2011
Te04	-6	1	2	04M01	14	615	10.25	0	0	0	2	2.08	2011
Te04	-6	2	2	04H01	9	615	10.25	0	0	0	2	2.08	2011
Te04	-4	1	1	04M01	14	640	10.66	2	1	1	2	2.08	2011
Te04	-4	2	1	04H01	9	640	10.66	3	3	0	2	2.08	2011
Te04	-3	1	1	04M01	14	645	10.75	2	2	0	2	2.08	2011
Te04	-3	2	1	04H01	9	645	10.75	1	1	0	2	2.08	2011
Te04	-2	1	1	04M01	14	650	10.83	8	7	1	2	2.08	2011
Te04	-2	2	1	04H01	9	650	10.83	5	2	3	2	2.08	2011
Te04	-1	1	1	04M01	14	660	11	7	7	0	2	2.08	2011
Te04	-1	2	1	04H01	9	660	11	1	1	0	2	2.08	2011
Te29	-16	1	4	29M01	5	720	12	0	0	0	1	1.04	2011
Te29	-16	2	4	29H01	1	720	12	0	0	0	1	1.04	2011
Te29	-14	1	4	29M01	5	630	10.5	0	0	0	1	1.04	2011
Te29	-14	2	4	29H01	1	630	10.5	2	0	2	1	1.04	2011
Te29	-12	1	3	29M01	5	585	9.75	0	0	0	1	1.04	2011
Te29	-12	2	3	29H01	1	585	9.75	0	0	0	1	1.04	2011
Te29	-10	1	3	29M01	5	585	9.75	0	0	0	1	1.04	2011
Te29	-10	2	3	29H01	1	585	9.75	0	0	0	1	1.04	2011
Te29	-8	1	2	29M01	5	600	10	0	0	0	1	1.04	2011
Te29	-8	2	2	29H01	1	600	10	0	0	0	1	1.04	2011
Te29	-7	1	2	29M01	5	615	10.25	0	0	0	1	1.04	2011
Te29	-7	2	2	29H01	1	615	10.25	0	0	0	1	1.04	2011
Te29	-6	1	2	29M01	5	645	10.75	2	2	0	1	1.04	2011
Te29	-6	2	2	29H01	1	645	10.75	3	3	0	1	1.04	2011
Te29	-5	1	2	29M01	5	645	10.75	2	1	1	1	1.04	2011
Te29	-5	2	2	29H01	1	645	10.75	1	1	0	1	1.04	2011
Te29	-4	1	1	29M01	5	660	11	3	3	0	1	1.04	2011
Te29	-4	2	1	29H01	1	660	11	2	1	1	1	1.04	2011
Te29	-3	1	1	29M01	5	645	10.75	3	3	0	1	1.04	2011
Te29	-3	2	1	29H01	1	645	10.75	4	4	0	1	1.04	2011
Te29	-2	1	1	29M01	5	665	11.08	2	2	0	1	1.04	2011
Te29	-2	2	1	29H01	1	665	11.08	1	1	0	1	1.04	2011
Te29	-1	1	1	29M01	5	675	11.25	4	4	0	1	1.04	2011
Te29	-1	2	1	29H01	1	675	11.25	1	1	0	1	1.04	2011
Te30	-16	1	4	30M01	3	759	12.65	9	1	8	1	0.97	2012
Te30	-16	2	4	30H01	5	759	12.65	5	0	5	1	0.97	2012
Te30	-15	1	4	30M01	3	692	11.53	7	3	4	1	0.97	2012
Te30	-15	2	4	30H01	5	692	11.53	4	2	2	1	0.97	2012
Te30	-14	1	4	30M01	3	690	11.5	5	3	2	1	0.97	2012
Te30	-14	2	4	30H01	5	690	11.5	3	0	3	1	0.97	2012
Te30	-13	1	4	30M01	3	690	11.5	0	0	0	1	0.97	2012
Te30	-13	2	4	30H01	5	690	11.5	0	0	0	1	0.97	2012
Te30	-12	1	3	30M01	3	675	11.25	1	0	1	1	0.97	2012
Te30	-12	2	3	30H01	5	675	11.25	2	1	1	1	0.97	2012
Te30	-11	1	3	30M01	3	630	10.5	0	0	0	1	0.97	2012
Te30	-11	2	3	30H01	5	630	10.5	0	0	0	1	0.97	2012
Te30	-10	1	3	30M01	3	600	10	0	0	0	1	0.97	2012
Te30	-10	2	3	30H01	5	600	10	0	0	0	1	0.97	2012
Te30	-9	1	3	30M01	3	615	10.25	0	0	0	1	0.97	2012
Te30	-9	2	3	30H01	5	615	10.25	0	0	0	1	0.97	2012
Te30	-8	1	2	30M01	3	630	10.5	0	0	0	1	0.97	2012
Te30	-8	2	2	30H01	5	630	10.5	0	0	0	1	0.97	2012
Te30	-7	1	2	30M01	3	555	9.25	2	2	0	1	0.97	2012
Te30	-7	2	2	30H01	5	555	9.25	2	2	0	1	0.97	2012
Te30	-6	1	2	30M01	3	615	10.25	0	0	0	1	0.97	2012
Te30	-6	2	2	30H01	5	615	10.25	1	0	1	1	0.97	2012
Te30	-5	1	2	30M01	3	630	10.5	9	3	6	1	0.97	2012
Te30	-5	2	2	30H01	5	630	10.5	9	8	1	1	0.97	2012
Te30	-4	1	1	30M01	3	630	10.5	0	0	0	1	0.97	2012
Te30	-4	2	1	30H01	5	630	10.5	0	0	0	1	0.97	2012
Te30	-3	1	1	30M01	3	600	10	4	3	1	1	0.97	2012
Te30	-3	2	1	30H01	5	600	10	2	2	0	1	0.97	2012
Te30	-2	1	1	30M01	3	570	9.5	2	0	2	1	0.97	2012
Te30	-2	2	1	30H01	5	570	9.5	0	0	0	1	0.97	2012
Te03	-15	1	4	03M01	10	761	12.68	10	0	10	2	1.94	2012
Te03	-15	2	4	03H01	11	761	12.68	7	1	6	2	1.94	2012
Te03	-14	1	4	03M01	10	691	11.51	10	2	8	2	1.94	2012
Te03	-14	2	4	03H01	11	691	11.51	7	3	4	2	1.94	2012
Te03	-13	1	4	03M01	10	702	11.7	0	0	0	2	1.94	2012
Te03	-13	2	4	03H01	11	702	11.7	0	0	0	2	1.94	2012
Te03	-12	1	3	03M01	10	690	11.5	4	0	4	2	1.94	2012
Te03	-12	2	3	03H01	11	690	11.5	6	5	1	2	1.94	2012
Te03	-11	1	3	03M01	10	690	11.5	2	1	1	2	1.94	2012
Te03	-11	2	3	03H01	11	690	11.5	2	2	0	2	1.94	2012
Te03	-10	1	3	03M01	10	630	10.5	0	0	0	2	1.94	2012
Te03	-10	2	3	03H01	11	630	10.5	0	0	0	2	1.94	2012
Te03	-9	1	3	03M01	10	600	10	0	0	0	2	1.94	2012
Te03	-9	2	3	03H01	11	600	10	0	0	0	2	1.94	2012
Te03	-8	1	2	03M01	10	615	10.25	0	0	0	2	1.94	2012
Te03	-8	2	2	03H01	11	615	10.25	1	0	1	2	1.94	2012
Te03	-7	1	2	03M01	10	645	10.75	0	0	0	2	1.94	2012
Te03	-7	2	2	03H01	11	645	10.75	0	0	0	2	1.94	2012
Te03	-6	1	2	03M01	10	660	11	1	0	1	2	1.94	2012
Te03	-6	2	2	03H01	11	660	11	5	1	4	2	1.94	2012
Te03	-5	1	2	03M01	10	645	10.75	7	7	0	2	1.94	2012
Te03	-5	2	2	03H01	11	645	10.75	4	3	1	2	1.94	2012
Te03	-4	1	1	03M01	10	630	10.5	0	0	0	2	1.94	2012
Te03	-4	2	1	03H01	11	630	10.5	1	1	0	2	1.94	2012
Te03	-3	1	1	03M01	10	630	10.5	3	3	0	2	1.94	2012
Te03	-3	2	1	03H01	11	630	10.5	2	1	1	2	1.94	2012
Te03	-2	1	1	03M01	10	630	10.5	4	2	2	2	1.94	2012
Te03	-2	2	1	03H01	11	630	10.5	3	1	2	2	1.94	2012
Te03	-1	1	1	03M01	10	645	10.75	17	13	4	2	1.94	2012
Te03	-1	2	1	03H01	11	645	10.75	4	1	3	2	1.94	2012
Te14	-15	1	4	14M01	13	660	11	5	1	4	2	1.86	2014
Te14	-15	2	4	14H01	16	660	11	2	0	2	2	1.86	2014
Te14	-14	1	4	14M01	13	660	11	0	0	0	2	1.86	2014
Te14	-14	2	4	14H01	16	660	11	0	0	0	2	1.86	2014
Te14	-13	1	4	14M01	13	660	11	12	2	10	2	1.86	2014
Te14	-13	2	4	14H01	16	660	11	4	2	2	2	1.86	2014
Te14	-12	1	3	14M01	13	660	11	11	4	7	2	1.86	2014
Te14	-12	2	3	14H01	16	660	11	5	2	3	2	1.86	2014
Te14	-11	1	3	14M01	13	660	11	0	0	0	2	1.86	2014
Te14	-11	2	3	14H01	16	660	11	0	0	0	2	1.86	2014
Te14	-10	1	3	14M01	13	660	11	0	0	0	2	1.86	2014
Te14	-10	2	3	14H01	16	660	11	0	0	0	2	1.86	2014
Te14	-9	1	3	14M01	13	660	11	15	10	5	2	1.86	2014
Te14	-9	2	3	14H01	16	660	11	9	8	1	2	1.86	2014
Te14	-8	1	2	14M01	13	660	11	0	0	0	2	1.86	2014
Te14	-8	2	2	14H01	16	660	11	0	0	0	2	1.86	2014
Te14	-7	1	2	14M01	13	660	11	0	0	0	2	1.86	2014
Te14	-7	2	2	14H01	16	660	11	0	0	0	2	1.86	2014
Te14	-6	1	2	14M01	13	600	10	0	0	0	2	1.86	2014
Te14	-6	2	2	14H01	16	600	10	0	0	0	2	1.86	2014
Te14	-5	1	2	14M01	13	600	10	16	10	6	2	1.86	2014
Te14	-5	2	2	14H01	16	600	10	8	6	2	2	1.86	2014
Te14	-4	1	1	14M01	13	600	10	2	2	0	2	1.86	2014
Te14	-4	2	1	14H01	16	600	10	2	2	0	2	1.86	2014
Te14	-3	1	1	14M01	13	600	10	0	0	0	2	1.86	2014
Te14	-3	2	1	14H01	16	600	10	0	0	0	2	1.86	2014
Te14	-2	1	1	14M01	13	600	10	5	5	0	2	1.86	2014
Te14	-2	2	1	14H01	16	600	10	2	2	0	2	1.86	2014
Te14	-1	1	1	14M01	13	600	10	1	1	0	2	1.86	2014
Te14	-1	2	1	14H01	16	600	10	1	1	0	2	1.86	2014
Te16	-15	1	4	16M01	13	660	11	10	3	7	2	1.86	2014
Te16	-15	2	4	16H01	14	660	11	4	1	3	2	1.86	2014
Te16	-14	1	4	16M01	13	660	11	0	0	0	2	1.86	2014
Te16	-14	2	4	16H01	14	660	11	0	0	0	2	1.86	2014
Te16	-13	1	4	16M01	13	660	11	9	5	4	2	1.86	2014
Te16	-13	2	4	16H01	14	660	11	9	6	3	2	1.86	2014
Te16	-12	1	3	16M01	13	660	11	2	1	1	2	1.86	2014
Te16	-12	2	3	16H01	14	660	11	2	1	1	2	1.86	2014
Te16	-11	1	3	16M01	13	660	11	0	0	0	2	1.86	2014
Te16	-11	2	3	16H01	14	660	11	0	0	0	2	1.86	2014
Te16	-10	1	3	16M01	13	660	11	0	0	0	2	1.86	2014
Te16	-10	2	3	16H01	14	660	11	0	0	0	2	1.86	2014
Te16	-9	1	3	16M01	13	660	11	0	0	0	2	1.86	2014
Te16	-9	2	3	16H01	14	660	11	0	0	0	2	1.86	2014
Te16	-8	1	2	16M01	13	660	11	0	0	0	2	1.86	2014
Te16	-8	2	2	16H01	14	660	11	0	0	0	2	1.86	2014
Te16	-7	1	2	16M01	13	660	11	9	6	3	2	1.86	2014
Te16	-7	2	2	16H01	14	660	11	5	4	1	2	1.86	2014
Te16	-6	1	2	16M01	13	600	10	0	0	0	2	1.86	2014
Te16	-6	2	2	16H01	14	600	10	0	0	0	2	1.86	2014
Te16	-5	1	2	16M01	13	600	10	8	6	2	2	1.86	2014
Te16	-5	2	2	16H01	14	600	10	4	2	2	2	1.86	2014
Te16	-4	1	1	16M01	13	600	10	12	10	2	2	1.86	2014
Te16	-4	2	1	16H01	14	600	10	6	5	1	2	1.86	2014
Te16	-3	1	1	16M01	13	600	10	2	2	0	2	1.86	2014
Te16	-3	2	1	16H01	14	600	10	2	2	0	2	1.86	2014
Te16	-2	1	1	16M01	13	600	10	0	0	0	2	1.86	2014
Te16	-2	2	1	16H01	14	600	10	0	0	0	2	1.86	2014
Te16	-1	1	1	16M01	13	600	10	0	0	0	2	1.86	2014
Te16	-1	2	1	16H01	14	600	10	0	0	0	2	1.86	2014

## Sheet: Nest-items
TERRI	DATE	WEEK	SEX	COUP	IND	EXPER	CONTROL	CONTRH	NESTMAT	FRESH	HARD	HOUR	YEAR	SPECIES
Te36	2015-10-24	-16	1	4	36M01	5	600	10	1	0	1	11:58:00	2016	Unidentified
Te36	2015-10-24	-16	1	4	36M01	5	600	10	1	1	0	12:00:00	2016	Pinus halepensis
Te36	2015-10-24	-16	1	4	36M01	5	600	10	1	0	1	12:02:00	2016	Unidentified
Te36	2015-10-24	-16	1	4	36M01	5	600	10	1	0	1	12:03:00	2016	Unidentified
Te36	2015-10-24	-16	1	4	36M01	5	600	10	1	0	1	12:04:00	2016	Unidentified
Te36	2015-10-24	-16	2	4	36H01	5	600	10	1	0	1	11:59:00	2016	Unidentified
Te36	2015-10-24	-16	2	4	36H01	5	600	10	1	0	1	12:01:00	2016	Unidentified
Te36	2015-10-24	-16	2	4	36H01	5	600	10	1	1	0	12:02:00	2016	Pinus halepensis
Te36	2015-10-24	-16	2	4	36H01	5	600	10	1	1	0	12:03:00	2016	Pinus halepensis
Te36	2015-10-24	-16	2	4	36H01	5	600	10	1	1	0	12:04:00	2016	Pinus halepensis
Te36	2015-11-19	-12	2	3	36H01	5	600	10	1	1	0	11:14:00	2016	Pinus halepensis
Te36	2015-11-28	-11	1	3	36M01	5	600	10	1	0	1	10:02:00	2016	Unidentified
Te36	2015-11-28	-11	1	3	36M01	5	600	10	1	0	1	10:06:00	2016	Unidentified
Te36	2015-11-28	-11	1	3	36M01	5	600	10	1	0	1	10:08:00	2016	Unidentified
Te36	2015-11-28	-11	1	3	36M01	5	600	10	1	1	0	10:10:00	2016	Pinus halepensis
Te36	2015-11-28	-11	1	3	36M01	5	600	10	1	0	1	10:18:00	2016	Unidentified
Te36	2015-11-28	-11	1	3	36M01	5	600	10	1	0	1	10:22:00	2016	Unidentified
Te36	2015-11-28	-11	1	3	36M01	5	600	10	1	0	1	10:27:00	2016	Unidentified
Te36	2015-11-28	-11	1	3	36M01	5	600	10	1	0	1	10:34:00	2016	Unidentified
Te36	2015-11-28	-11	1	3	36M01	5	600	10	1	0	1	10:41:00	2016	Unidentified
Te36	2015-11-28	-11	1	3	36M01	5	600	10	1	0	1	10:46:00	2016	Unidentified
Te36	2015-11-28	-11	1	3	36M01	5	600	10	1	0	1	10:57:00	2016	Unidentified
Te36	2015-11-28	-11	2	3	36H01	5	600	10	1	0	1	10:04:00	2016	Unidentified
Te36	2015-11-28	-11	2	3	36H01	5	600	10	1	0	1	10:07:00	2016	Unidentified
Te36	2015-11-28	-11	2	3	36H01	5	600	10	1	0	1	10:19:00	2016	Unidentified
Te36	2015-11-28	-11	2	3	36H01	5	600	10	1	0	1	10:26:00	2016	Unidentified
Te36	2015-11-28	-11	2	3	36H01	5	600	10	1	0	1	10:37:00	2016	Unidentified
Te36	2015-12-04	-10	1	3	36M01	5	600	10	1	1	0	11:49:00	2016	Pinus halepensis
Te36	2015-12-04	-10	1	3	36M01	5	600	10	1	0	1	12:15:00	2016	Unidentified
Te36	2015-12-04	-10	1	3	36M01	5	600	10	1	0	1	12:19:00	2016	Unidentified
Te36	2015-12-04	-10	1	3	36M01	5	600	10	1	1	0	12:27:00	2016	Pinus halepensis
Te36	2015-12-04	-10	1	3	36M01	5	600	10	1	1	0	12:39:00	2016	Pinus halepensis
Te36	2015-12-04	-10	1	3	36M01	5	600	10	1	1	0	12:45:00	2016	Pinus halepensis
Te36	2015-12-04	-10	2	3	36H01	5	600	10	1	0	1	11:52:00	2016	Unidentified
Te36	2015-12-04	-10	2	3	36H01	5	600	10	1	0	1	12:11:00	2016	Unidentified
Te36	2015-12-04	-10	2	3	36H01	5	600	10	1	0	1	12:28:00	2016	Pinus halepensis
Te36	2015-12-04	-10	2	3	36H01	5	600	10	1	0	1	12:39:00	2016	Unidentified
Te36	2015-12-04	-10	2	3	36H01	5	600	10	1	0	1	12:45:00	2016	Unidentified
Te36	2015-12-04	-10	2	3	36H01	5	600	10	1	0	1	12:52:00	2016	Unidentified
Te36	2015-12-18	-8	2	2	36H01	5	600	10	1	1	0	10:09:00	2016	Pinus halepensis
Te36	2015-12-24	-7	1	2	36M01	5	600	10	1	0	1	12:59:00	2016	Unidentified
Te36	2015-12-24	-7	2	2	36H01	5	600	10	1	0	1	12:22:00	2016	Unidentified
Te36	2016-01-02	-6	1	2	36M01	5	600	10	1	0	1	09:36:00	2016	Unidentified
Te36	2016-01-02	-6	1	2	36M01	5	600	10	1	0	1	09:58:00	2016	Unidentified
Te36	2016-01-02	-6	1	2	36M01	5	600	10	1	0	1	11:56:00	2016	Unidentified
Te36	2016-01-02	-6	1	2	36M01	5	600	10	1	0	1	13:04:00	2016	Unidentified
Te36	2016-01-02	-6	1	2	36M01	5	600	10	1	0	1	13:07:00	2016	Unidentified
Te36	2016-01-02	-6	1	2	36M01	5	600	10	1	1	0	13:13:00	2016	Pinus halepensis
Te36	2016-01-02	-6	1	2	36M01	5	600	10	1	0	1	13:19:00	2016	Unidentified
Te36	2016-01-02	-6	1	2	36M01	5	600	10	1	0	1	13:25:00	2016	Unidentified
Te36	2016-01-02	-6	1	2	36M01	5	600	10	1	1	0	13:30:00	2016	Pinus halepensis
Te36	2016-01-02	-6	1	2	36M01	5	600	10	1	1	0	13:36:00	2016	Pinus halepensis
Te36	2016-01-02	-6	2	2	36H01	5	600	10	1	0	1	11:56:00	2016	Unidentified
Te36	2016-01-02	-6	2	2	36H01	5	600	10	1	0	1	13:04:00	2016	Unidentified
Te36	2016-01-02	-6	2	2	36H01	5	600	10	1	0	1	13:09:00	2016	Unidentified
Te36	2016-01-02	-6	2	2	36H01	5	600	10	1	0	1	13:24:00	2016	Unidentified
Te36	2016-01-02	-6	2	2	36H01	5	600	10	1	0	1	13:29:00	2016	Unidentified
Te36	2016-01-02	-6	2	2	36H01	5	600	10	1	0	1	13:39:00	2016	Unidentified
Te36	2016-01-02	-6	2	2	36H01	5	600	10	1	0	1	14:20:00	2016	Unidentified
Te36	2016-01-28	-2	1	1	36M01	5	660	11	1	1	0	10:54:00	2016	Pinus halepensis
Te36	2016-01-28	-2	1	1	36M01	5	660	11	1	1	0	16:10:00	2016	Pinus halepensis
Te36	2016-01-28	-2	1	1	36M01	5	660	11	1	1	0	16:13:00	2016	Ephedra fragilis
Te36	2016-01-28	-2	1	1	36M01	5	660	11	1	1	0	16:14:00	2016	Ephedra fragilis
Te36	2016-01-28	-2	1	1	36M01	5	660	11	1	1	0	16:21:00	2016	Stipa tenacissima
Te36	2016-01-28	-2	2	1	36H01	5	660	11	1	1	0	16:24:00	2016	Pinus halepensis
Te36	2016-02-05	-1	1	1	36M01	5	660	11	1	1	0	11:56:00	2016	Stipa tenacissima
Al01	2010-12-25	-3	1	1	01M88	11	645	10.75	1	1	0	08:43:00	2011	Unidentified
Al01	2010-12-25	-3	1	1	01M88	11	645	10.75	1	1	0	10:22:00	2011	Unidentified
Al01	2010-12-25	-3	2	1	01H88	13	645	10.75	1	1	0	10:22:00	2011	Unidentified
Al01	2011-01-03	-2	2	1	01H88	13	655	10.91	1	0	1	09:38:00	2011	Retama sphaerocarpa
Al01	2011-01-03	-2	2	1	01H88	13	655	10.91	1	1	0	09:47:00	2011	Unidentified
Al01	2011-01-03	-2	1	1	01M88	11	655	10.91	1	0	1	09:49:00	2011	Unidentified
Al01	2011-01-03	-2	1	1	01M88	11	655	10.91	1	1	0	09:55:00	2011	Unidentified
Al01	2011-01-03	-2	2	1	01H88	13	655	10.91	1	1	0	10:03:00	2011	Olea europaea
Al01	2011-01-03	-2	1	1	01M88	11	655	10.91	1	1	0	10:05:00	2011	Unidentified
Al01	2011-01-03	-2	1	1	01M88	11	655	10.91	1	1	0	10:18:00	2011	Unidentified
Al01	2011-01-12	-1	1	1	01M88	11	640	10.66	1	1	0	09:31:00	2011	Olea europaea
Al01	2011-01-12	-1	2	1	01H88	13	640	10.66	1	0	1	09:34:00	2011	Stipa tenacissima
Al01	2011-01-12	-1	2	1	01H88	13	640	10.66	1	1	0	16:16:00	2011	Olea europaea
Al01	2011-01-12	-1	2	1	01H88	13	640	10.66	1	1	0	16:25:00	2011	Unidentified
Al01	2011-01-12	-1	1	1	01M88	11	640	10.66	1	1	0	17:20:00	2011	Olea europaea
Al01	2011-01-12	-1	1	1	01M88	11	640	10.66	1	1	0	17:24:00	2011	Olea europaea
Te05	2011-11-14	-13	1	4	05M01	2	660	11	1	0	1	09:12:00	2012	Unidentified
Te05	2011-11-14	-13	1	4	05M01	2	660	11	1	1	0	09:16:00	2012	Pinus halepensis
Te05	2011-11-14	-13	1	4	05M01	2	660	11	1	1	0	09:24:00	2012	Pinus halepensis
Te05	2011-11-14	-13	1	4	05M01	2	660	11	1	1	0	10:15:00	2012	Pinus halepensis
Te05	2011-11-14	-13	1	4	05M01	2	660	11	1	1	0	11:55:00	2012	Pinus halepensis
Te05	2011-11-14	-13	1	4	05M01	2	660	11	1	1	0	11:59:00	2012	Pinus halepensis
Te05	2011-11-14	-13	1	4	05M01	2	660	11	1	1	0	12:03:00	2012	Pinus halepensis
Te05	2011-11-14	-13	1	4	05M01	2	660	11	1	1	0	12:18:00	2012	Pinus halepensis
Te05	2011-11-14	-13	1	4	05M01	2	660	11	1	1	0	12:30:00	2012	Pinus halepensis
Te05	2011-11-14	-13	1	4	05M01	2	660	11	1	1	0	12:33:00	2012	Pinus halepensis
Te05	2011-11-14	-13	2	4	05H01	9	660	11	1	1	0	08:50:00	2012	Pinus halepensis
Te05	2011-11-14	-13	2	4	05H01	9	660	11	1	1	0	09:12:00	2012	Pinus halepensis
Te05	2011-11-14	-13	2	4	05H01	9	660	11	1	1	0	09:16:00	2012	Unidentified
Te05	2011-11-14	-13	2	4	05H01	9	660	11	1	1	0	09:24:00	2012	Pinus halepensis
Te05	2011-11-14	-13	2	4	05H01	9	660	11	1	0	1	09:50:00	2012	Unidentified
Te05	2011-11-14	-13	2	4	05H01	9	660	11	1	0	1	10:02:00	2012	Unidentified
Te05	2011-11-14	-13	2	4	05H01	9	660	11	1	1	0	10:07:00	2012	Pinus halepensis
Te05	2011-11-14	-13	2	4	05H01	9	660	11	1	1	0	10:15:00	2012	Pinus halepensis
Te05	2011-11-14	-13	2	4	05H01	9	660	11	1	0	1	11:32:00	2012	Unidentified
Te05	2011-11-14	-13	2	4	05H01	9	660	11	1	1	0	11:57:00	2012	Pinus halepensis
Te05	2011-11-14	-13	2	4	05H01	9	660	11	1	1	0	12:03:00	2012	Pinus halepensis
Te05	2011-11-14	-13	2	4	05H01	9	660	11	1	1	0	12:09:00	2012	Pinus halepensis
Te05	2011-11-14	-13	2	4	05H01	9	660	11	1	1	0	12:17:00	2012	Pinus halepensis
Te05	2011-11-14	-13	2	4	05H01	9	660	11	1	1	0	12:20:00	2012	Pinus halepensis
Te05	2011-11-14	-13	2	4	05H01	9	660	11	1	0	1	12:24:00	2012	Unidentified
Te05	2011-11-14	-13	2	4	05H01	9	660	11	1	0	1	12:29:00	2012	Unidentified
Te05	2011-11-14	-13	2	4	05H01	9	660	11	1	1	0	12:34:00	2012	Pinus halepensis
Te05	2011-11-14	-13	2	4	05H01	9	660	11	1	1	0	12:42:00	2012	Pinus halepensis
Te05	2011-11-14	-13	2	4	05H01	9	660	11	1	1	0	12:45:00	2012	Pinus halepensis
Te05	2011-11-14	-13	2	4	05H01	9	660	11	1	0	1	12:55:00	2012	Unidentified
Te05	2011-11-14	-13	2	4	05H01	9	660	11	1	1	0	12:57:00	2012	Pinus halepensis
Te05	2011-11-14	-13	2	4	05H01	9	660	11	1	1	0	13:55:00	2012	Pinus halepensis
Te05	2011-11-14	-13	2	4	05H01	9	660	11	1	1	0	13:59:00	2012	Pinus halepensis
Te05	2011-11-14	-13	2	4	05H01	9	660	11	1	1	0	17:46:00	2012	Pinus halepensis
Te05	2011-11-22	-12	1	3	05M01	2	630	10.5	1	1	0	09:32:00	2012	Pinus halepensis
Te05	2011-11-22	-12	2	3	05H01	9	630	10.5	1	0	1	10:11:00	2012	Unidentified
Te05	2011-11-22	-12	2	3	05H01	9	630	10.5	1	1	0	17:01:00	2012	Pinus halepensis
Te05	2011-11-29	-11	2	3	05H01	9	655	10.91	1	1	0	10:11:00	2012	Pinus halepensis
Te05	2011-11-29	-11	2	3	05H01	9	655	10.91	1	1	0	10:20:00	2012	Pinus halepensis
Te05	2011-12-26	-7	1	2	05M01	2	585	9.75	1	1	0	08:55:00	2012	Pinus halepensis
Te05	2011-12-26	-7	1	2	05M01	2	585	9.75	1	1	0	09:30:00	2012	Pinus halepensis
Te05	2011-12-26	-7	1	2	05M01	2	585	9.75	1	1	0	09:35:00	2012	Pinus halepensis
Te05	2011-12-26	-7	1	2	05M01	2	585	9.75	1	1	0	09:39:00	2012	Pinus halepensis
Te05	2011-12-26	-7	1	2	05M01	2	585	9.75	1	1	0	10:10:00	2012	Unidentified
Te05	2011-12-26	-7	1	2	05M01	2	585	9.75	1	1	0	10:12:00	2012	Pinus halepensis
Te05	2011-12-26	-7	1	2	05M01	2	585	9.75	1	1	0	10:19:00	2012	Pinus halepensis
Te05	2011-12-26	-7	1	2	05M01	2	585	9.75	1	1	0	10:27:00	2012	Pinus halepensis
Te05	2011-12-26	-7	1	2	05M01	2	585	9.75	1	1	0	10:33:00	2012	Pinus halepensis
Te05	2011-12-26	-7	1	2	05M01	2	585	9.75	1	1	0	10:36:00	2012	Pinus halepensis
Te05	2011-12-26	-7	1	2	05M01	2	585	9.75	1	1	0	10:40:00	2012	Pinus halepensis
Te05	2011-12-26	-7	1	2	05M01	2	585	9.75	1	1	0	11:36:00	2012	Pinus halepensis
Te05	2011-12-26	-7	1	2	05M01	2	585	9.75	1	1	0	11:46:00	2012	Unidentified
Te05	2011-12-26	-7	1	2	05M01	2	585	9.75	1	1	0	11:50:00	2012	Pinus halepensis
Te05	2011-12-26	-7	1	2	05M01	2	585	9.75	1	1	0	11:58:00	2012	Unidentified
Te05	2011-12-26	-7	1	2	05M01	2	585	9.75	1	1	0	12:05:00	2012	Pinus halepensis
Te05	2011-12-26	-7	2	2	05H01	9	585	9.75	1	1	0	08:54:00	2012	Pinus halepensis
Te05	2011-12-26	-7	2	2	05H01	9	585	9.75	1	1	0	09:30:00	2012	Pinus halepensis
Te05	2011-12-26	-7	2	2	05H01	9	585	9.75	1	1	0	09:37:00	2012	Pinus halepensis
Te05	2011-12-26	-7	2	2	05H01	9	585	9.75	1	1	0	09:45:00	2012	Pinus halepensis
Te05	2011-12-26	-7	2	2	05H01	9	585	9.75	1	0	1	09:48:00	2012	Unidentified
Te05	2011-12-26	-7	2	2	05H01	9	585	9.75	1	1	0	09:52:00	2012	Pinus halepensis
Te05	2011-12-26	-7	2	2	05H01	9	585	9.75	1	1	0	10:02:00	2012	Pinus halepensis
Te05	2011-12-26	-7	2	2	05H01	9	585	9.75	1	1	0	10:06:00	2012	Pinus halepensis
Te05	2011-12-26	-7	2	2	05H01	9	585	9.75	1	1	0	10:10:00	2012	Pinus halepensis
Te05	2011-12-26	-7	2	2	05H01	9	585	9.75	1	1	0	10:17:00	2012	Pinus halepensis
Te05	2011-12-26	-7	2	2	05H01	9	585	9.75	1	1	0	10:24:00	2012	Pinus halepensis
Te05	2011-12-26	-7	2	2	05H01	9	585	9.75	1	1	0	10:32:00	2012	Pinus halepensis
Te05	2011-12-26	-7	2	2	05H01	9	585	9.75	1	0	1	10:35:00	2012	Unidentified
Te05	2011-12-26	-7	2	2	05H01	9	585	9.75	1	1	0	11:36:00	2012	Pinus halepensis
Te05	2011-12-26	-7	2	2	05H01	9	585	9.75	1	1	0	11:43:00	2012	Unidentified
Te05	2011-12-26	-7	2	2	05H01	9	585	9.75	1	1	0	11:46:00	2012	Unidentified
Te05	2011-12-26	-7	2	2	05H01	9	585	9.75	1	1	0	11:50:00	2012	Pinus halepensis
Te05	2011-12-26	-7	2	2	05H01	9	585	9.75	1	1	0	11:58:00	2012	Pinus halepensis
Te05	2011-12-26	-7	2	2	05H01	9	585	9.75	1	1	0	12:05:00	2012	Pinus halepensis
Te05	2012-01-10	-5	1	2	05M01	2	645	10.75	1	1	0	17:40:00	2012	Pinus halepensis
Te05	2012-01-10	-5	1	2	05M01	2	645	10.75	1	1	0	17:46:00	2012	Pinus halepensis
Te05	2012-01-10	-5	2	2	05H01	9	645	10.75	1	1	0	17:39:00	2012	Pinus halepensis
Te05	2012-01-10	-5	2	2	05H01	9	645	10.75	1	1	0	17:47:00	2012	Pinus halepensis
Te05	2012-01-18	-4	1	1	05M01	2	645	10.75	1	1	0	10:43:00	2012	Pinus halepensis
Te05	2012-01-18	-4	1	1	05M01	2	645	10.75	1	1	0	10:48:00	2012	Pinus halepensis
Te05	2012-01-18	-4	2	1	05H01	9	645	10.75	1	1	0	10:51:00	2012	Pinus halepensis
Te05	2012-01-31	-2	2	1	05H01	9	660	11	1	1	0	18:06:00	2012	Pinus halepensis
Te05	2012-02-07	-1	1	1	05M01	2	660	11	1	1	0	12:01:00	2012	Pinus halepensis
Te05	2012-02-07	-1	1	1	05M01	2	660	11	1	1	0	16:21:00	2012	Pinus halepensis
Te05	2012-02-07	-1	1	1	05M01	2	660	11	1	1	0	16:37:00	2012	Pinus halepensis
Te05	2012-02-07	-1	1	1	05M01	2	660	11	1	0	1	16:55:00	2012	Unidentified
Te05	2012-02-07	-1	2	1	05H01	9	660	11	1	1	0	15:43:00	2012	Pinus halepensis
Te05	2012-02-07	-1	2	1	05H01	9	660	11	1	1	0	15:56:00	2012	Unidentified
Te05	2012-02-07	-1	2	1	05H01	9	660	11	1	1	0	16:22:00	2012	Pinus halepensis
Te05	2012-02-07	-1	2	1	05H01	9	660	11	1	0	1	16:35:00	2012	Unidentified
Te05	2012-02-07	-1	2	1	05H01	9	660	11	1	1	0	16:42:00	2012	Unidentified
Te05	2012-02-07	-1	2	1	05H01	9	660	11	1	1	0	16:47:00	2012	Unidentified
Te05	2012-02-07	-1	2	1	05H01	9	660	11	1	1	0	16:57:00	2012	Palmito
Te05	2012-02-07	-1	2	1	05H01	9	660	11	1	1	0	17:04:00	2012	Pinus halepensis
Te05	2012-02-07	-1	2	1	05H01	9	660	11	1	1	0	17:29:00	2012	Unidentified
Te05	2012-02-07	-1	2	1	05H01	9	660	11	1	1	0	17:34:00	2012	Unidentified
Te05	2012-02-07	-1	2	1	05H01	9	660	11	1	1	0	17:44:00	2012	Unidentified
Te11	2011-11-30	-8	1	2	11M01	11	660	11	1	1	0	11:18:00	2012	Unidentified
Te11	2011-11-30	-8	1	2	11M01	11	660	11	1	0	1	11:29:00	2012	Unidentified
Te11	2011-11-30	-8	2	2	11H01	11	660	11	1	1	0	11:17:00	2012	Unidentified
Te11	2011-12-27	-4	1	1	11M01	11	630	10.5	1	0	1	10:21:00	2012	Unidentified
Te11	2011-12-27	-4	1	1	11M01	11	630	10.5	1	1	0	10:40:00	2012	Unidentified
Te11	2011-12-27	-4	2	1	11H01	11	630	10.5	1	0	1	09:01:00	2012	Unidentified
Te11	2011-12-27	-4	2	1	11H01	11	630	10.5	1	0	1	10:24:00	2012	Unidentified
Te11	2011-12-27	-4	2	1	11H01	11	630	10.5	1	0	1	10:46:00	2012	Unidentified
Te11	2012-01-04	-3	1	1	11M01	11	645	10.75	1	1	0	10:21:00	2012	Stipa tenacissima
Te11	2012-01-04	-3	1	1	11M01	11	645	10.75	1	1	0	10:27:00	2012	Unidentified
Te11	2012-01-04	-3	1	1	11M01	11	645	10.75	1	1	0	11:18:00	2012	Unidentified
Te11	2012-01-04	-3	1	1	11M01	11	645	10.75	1	0	1	11:24:00	2012	Unidentified
Te11	2012-01-04	-3	1	1	11M01	11	645	10.75	1	1	0	11:34:00	2012	Pistacia lentiscus
Te11	2012-01-04	-3	1	1	11M01	11	645	10.75	1	0	1	11:42:00	2012	Unidentified
Te11	2012-01-04	-3	2	1	11H01	11	645	10.75	1	0	1	10:12:00	2012	Unidentified
Te11	2012-01-04	-3	2	1	11H01	11	645	10.75	1	1	0	11:26:00	2012	Unidentified
Te11	2012-01-04	-3	2	1	11H01	11	645	10.75	1	1	0	11:35:00	2012	Retama sphaerocarpa
Te11	2012-01-11	-2	2	1	11H01	11	590	9.83	1	1	0	10:27:00	2012	Unidentified
Te11	2012-01-11	-2	2	1	11H01	11	590	9.83	1	1	0	18:09:00	2012	Unidentified
Te25	2011-11-12	-13	1	4	25M01	3	645	10.75	1	0	1	08:06:00	2012	Unidentified
Te25	2011-11-12	-13	2	4	25H01	9	645	10.75	1	1	0	08:05:00	2012	Pinus halepensis
Te25	2011-11-12	-13	2	4	25H01	9	645	10.75	1	0	1	08:24:00	2012	Unidentified
Te25	2011-12-03	-9	1	3	25M01	3	645	10.75	1	0	1	08:43:00	2012	Unidentified
Te25	2011-12-03	-9	1	3	25M01	3	645	10.75	1	0	1	12:48:00	2012	Unidentified
Te25	2011-12-03	-9	1	3	25M01	3	645	10.75	1	0	1	12:58:00	2012	Unidentified
Te25	2011-12-03	-9	1	3	25M01	3	645	10.75	1	0	1	13:05:00	2012	Unidentified
Te25	2011-12-03	-9	1	3	25M01	3	645	10.75	1	0	1	13:09:00	2012	Unidentified
Te25	2011-12-03	-9	1	3	25M01	3	645	10.75	1	0	1	13:12:00	2012	Unidentified
Te25	2011-12-03	-9	2	3	25H01	9	645	10.75	1	1	0	08:40:00	2012	Pinus halepensis
Te25	2011-12-03	-9	2	3	25H01	9	645	10.75	1	1	0	09:03:00	2012	Pinus halepensis
Te25	2011-12-03	-9	2	3	25H01	9	645	10.75	1	0	1	12:43:00	2012	Unidentified
Te25	2011-12-03	-9	2	3	25H01	9	645	10.75	1	1	0	12:47:00	2012	Pinus halepensis
Te25	2011-12-03	-9	2	3	25H01	9	645	10.75	1	0	1	13:04:00	2012	Unidentified
Te25	2011-12-03	-9	2	3	25H01	9	645	10.75	1	0	1	13:07:00	2012	Unidentified
Te25	2011-12-03	-9	2	3	25H01	9	645	10.75	1	0	1	13:09:00	2012	Unidentified
Te25	2011-12-03	-9	2	3	25H01	9	645	10.75	1	0	1	13:15:00	2012	Unidentified
Te25	2011-12-21	-7	1	2	25M01	3	640	10.66	1	0	1	08:31:00	2012	Unidentified
Te25	2011-12-21	-7	1	2	25M01	3	640	10.66	1	0	1	09:04:00	2012	Unidentified
Te25	2011-12-21	-7	1	2	25M01	3	640	10.66	1	0	1	09:07:00	2012	Unidentified
Te25	2011-12-21	-7	2	2	25H01	9	640	10.66	1	1	0	08:28:00	2012	Unidentified
Te25	2011-12-21	-7	2	2	25H01	9	640	10.66	1	0	1	08:34:00	2012	Unidentified
Te25	2011-12-21	-7	2	2	25H01	9	640	10.66	1	0	1	09:08:00	2012	Unidentified
Te25	2012-01-05	-5	1	2	25M01	3	660	11	1	1	0	10:53:00	2012	Retama sphaerocarpa
Te25	2012-01-05	-5	2	2	25H01	9	660	11	1	1	0	10:54:00	2012	Retama sphaerocarpa
Te25	2012-01-13	-3	1	1	25M01	3	660	11	1	1	0	11:22:00	2012	Pistacia lentiscus
Te25	2012-01-13	-3	1	1	25M01	3	660	11	1	1	0	11:40:00	2012	Stipa tenacissima
Te25	2012-01-13	-3	2	1	25H01	9	660	11	1	1	0	11:36:00	2012	Pistacia lentiscus
Te25	2012-01-13	-3	2	1	25H01	9	660	11	1	1	0	11:49:00	2012	Retama sphaerocarpa
Te25	2012-01-21	-2	1	1	25M01	3	655	10.91	1	1	0	10:39:00	2012	Stipa tenacissima
Te25	2012-01-21	-2	1	1	25M01	3	655	10.91	1	1	0	12:00:00	2012	Unidentified
Te25	2012-01-21	-2	2	1	25H01	9	655	10.91	1	1	0	10:40:00	2012	Retama sphaerocarpa
Te25	2012-01-21	-2	2	1	25H01	9	655	10.91	1	1	0	12:03:00	2012	Pistacia lentiscus
Te25	2012-01-26	-1	1	1	25M01	3	660	11	1	0	1	11:12:00	2012	Unidentified
Te25	2012-01-26	-1	2	1	25H01	9	660	11	1	1	0	10:27:00	2012	Pistacia lentiscus
Te25	2012-01-26	-1	2	1	25H01	9	660	11	1	1	0	10:31:00	2012	Retama sphaerocarpa
Te21	2011-11-11	-12	1	3	21M01	11	660	11	1	0	1	08:54:00	2012	Unidentified
Te21	2011-11-11	-12	1	3	21M01	11	660	11	1	1	0	09:07:00	2012	Pino carrasco
Te21	2011-11-11	-12	1	3	21M01	11	660	11	1	1	0	09:17:00	2012	Pino carrasco
Te21	2011-11-11	-12	1	3	21M01	11	660	11	1	1	0	09:33:00	2012	Unidentified
Te21	2011-11-11	-12	1	3	21M01	11	660	11	1	0	1	09:37:00	2012	Unidentified
Te21	2011-11-11	-12	1	3	21M01	11	660	11	1	0	1	09:47:00	2012	Unidentified
Te21	2011-11-11	-12	1	3	21M01	11	660	11	1	1	0	10:02:00	2012	Pinus halepensis
Te21	2011-11-11	-12	1	3	21M01	11	660	11	1	1	0	10:06:00	2012	Pinus halepensis
Te21	2011-11-11	-12	1	3	21M01	11	660	11	1	1	0	10:24:00	2012	Stipa tenacissima
Te21	2011-11-11	-12	1	3	21M01	11	660	11	1	0	1	10:31:00	2012	Unidentified
Te21	2011-11-11	-12	2	3	21H01	11	660	11	1	0	1	08:50:00	2012	Unidentified
Te21	2011-11-11	-12	2	3	21H01	11	660	11	1	0	1	08:56:00	2012	Unidentified
Te21	2011-11-11	-12	2	3	21H01	11	660	11	1	0	1	09:03:00	2012	Unidentified
Te21	2011-11-11	-12	2	3	21H01	11	660	11	1	1	0	09:27:00	2012	Pinus halepensis
Te21	2011-11-11	-12	2	3	21H01	11	660	11	1	1	0	09:33:00	2012	Unidentified
Te21	2011-11-11	-12	2	3	21H01	11	660	11	1	0	1	10:20:00	2012	Unidentified
Te21	2011-12-09	-8	1	2	21M01	11	630	10.5	1	1	0	08:28:00	2012	Pinus halepensis
Te21	2011-12-09	-8	1	2	21M01	11	630	10.5	1	1	0	08:33:00	2012	Pistacia lentiscus
Te21	2011-12-09	-8	1	2	21M01	11	630	10.5	1	1	0	08:35:00	2012	Pistacia lentiscus
Te21	2011-12-09	-8	2	2	21H01	11	630	10.5	1	1	0	08:21:00	2012	Pinus halepensis
Te21	2011-12-09	-8	2	2	21H01	11	630	10.5	1	1	0	08:25:00	2012	Unidentified
Te21	2011-12-09	-8	2	2	21H01	11	630	10.5	1	0	1	08:34:00	2012	Unidentified
Te21	2011-12-16	-7	1	2	21M01	11	570	9.5	1	0	1	09:33:00	2012	Unidentified
Te21	2011-12-22	-6	1	2	21M01	11	620	10.33	1	0	1	08:45:00	2012	Unidentified
Te21	2011-12-22	-6	2	2	21H01	11	620	10.33	1	1	0	08:42:00	2012	Unidentified
Te21	2011-12-22	-6	2	2	21H01	11	620	10.33	1	1	0	08:52:00	2012	Unidentified
Te21	2011-12-22	-6	2	2	21H01	11	620	10.33	1	1	0	12:25:00	2012	Unidentified
Te21	2011-12-30	-5	1	2	21M01	11	630	10.5	1	0	1	08:57:00	2012	Unidentified
Te21	2012-01-20	-2	1	1	21M01	11	650	10.83	1	1	0	10:15:00	2012	Pistacia lentiscus
Te21	2012-01-20	-2	1	1	21M01	11	650	10.83	1	0	1	11:31:00	2012	Unidentified
Te21	2012-01-20	-2	1	1	21M01	11	650	10.83	1	0	1	11:51:00	2012	Unidentified
Te21	2012-01-20	-2	1	1	21M01	11	650	10.83	1	1	0	12:02:00	2012	Unidentified
Te21	2012-01-20	-2	2	1	21H01	11	650	10.83	1	1	0	11:27:00	2012	Pistacia lentiscus
Te21	2012-01-20	-2	2	1	21H01	11	650	10.83	1	1	0	11:40:00	2012	Unidentified
Te21	2012-01-25	-1	1	1	21M01	11	645	10.75	1	1	0	10:37:00	2012	Pistacia lentiscus
Te21	2012-01-25	-1	2	1	21H01	11	645	10.75	1	1	0	09:46:00	2012	Pistacia lentiscus
Te06	2011-11-13	-10	1	3	06M01	5	660	11	1	0	1	11:51:00	2012	Unidentified
Te06	2011-11-13	-10	2	3	06H01	5	660	11	1	0	1	11:48:00	2012	Unidentified
Te06	2012-01-15	-1	2	1	06H01	5	620	10.33	1	1	0	10:19:00	2012	Unidentified
Te24	2010-11-15	-12	1	3	24M01	9	600	10	1	1	0	09:22:00	2011	Pinus halepensis
Te24	2010-11-15	-12	2	3	24H01	9	600	10	1	1	0	09:21:00	2011	Pinus halepensis
Te24	2010-11-15	-12	2	3	24H01	9	600	10	1	0	1	09:45:00	2011	Pinus halepensis
Te18	2010-10-20	-14	1	4	18M01	14	720	12	1	1	0	12:01:00	2011	Unidentified
Te18	2010-10-20	-14	1	4	18M01	14	720	12	1	1	0	12:11:00	2011	Unidentified
Te18	2010-10-20	-14	1	4	18M01	14	720	12	1	1	0	12:21:00	2011	Unidentified
Te18	2010-10-20	-14	2	4	18H01	16	720	12	1	0	1	12:00:00	2011	Unidentified
Te18	2010-11-03	-12	1	3	18M01	14	660	11	1	0	1	10:06:00	2011	Unidentified
Te18	2010-11-03	-12	1	3	18M01	14	660	11	1	0	1	10:56:00	2011	Unidentified
Te18	2010-11-03	-12	2	3	18H01	16	660	11	1	0	1	10:49:00	2011	Unidentified
Te18	2010-12-15	-6	1	2	18M01	14	600	10	1	0	1	11:02:00	2011	Unidentified
Te18	2010-12-15	-6	1	2	18M01	14	600	10	1	0	1	11:31:00	2011	Unidentified
Te18	2010-12-15	-6	1	2	18M01	14	600	10	1	0	1	11:50:00	2011	Unidentified
Te18	2010-12-15	-6	2	2	18H01	16	600	10	1	0	1	11:22:00	2011	Unidentified
Te18	2010-12-15	-6	2	2	18H01	16	600	10	1	0	1	11:37:00	2011	Unidentified
Te18	2010-12-23	-5	1	2	18M01	14	600	10	1	1	0	10:21:00	2011	Unidentified
Te18	2010-12-23	-5	1	2	18M01	14	600	10	1	1	0	10:48:00	2011	Unidentified
Te18	2010-12-30	-4	1	1	18M01	14	620	10.33	1	0	1	11:14:00	2011	Unidentified
Te18	2010-12-30	-4	1	1	18M01	14	620	10.33	1	0	1	11:26:00	2011	Unidentified
Te18	2010-12-30	-4	1	1	18M01	14	620	10.33	1	1	0	11:30:00	2011	Unidentified
Te18	2010-12-30	-4	1	1	18M01	14	620	10.33	1	1	0	15:05:00	2011	Unidentified
Te18	2010-12-30	-4	2	1	18H01	16	620	10.33	1	1	0	11:20:00	2011	Unidentified
Te18	2010-12-30	-4	2	1	18H01	16	620	10.33	1	1	0	11:38:00	2011	Rosmarinus officinalis
Te18	2010-12-30	-4	2	1	18H01	16	620	10.33	1	0	1	15:09:00	2011	Unidentified
Te18	2011-01-05	-3	1	1	18M01	14	615	10.25	1	1	0	10:35:00	2011	Pinus halepensis
Te18	2011-01-12	-2	1	1	18M01	14	650	10.83	1	1	0	09:34:00	2011	Pinus halepensis
Te18	2011-01-12	-2	1	1	18M01	14	650	10.83	1	1	0	16:55:00	2011	Pinus halepensis
Te18	2011-01-12	-2	2	1	18H01	16	650	10.83	1	1	0	09:35:00	2011	Pinus halepensis
Te18	2011-01-12	-2	2	1	18H01	16	650	10.83	1	1	0	16:56:00	2011	Pinus halepensis
Te18	2011-01-18	-1	1	1	18M01	14	655	10.91	1	0	1	11:25:00	2011	Unidentified
Te18	2011-01-18	-1	1	1	18M01	14	655	10.91	1	1	0	12:20:00	2011	Pinus halepensis
Te18	2011-01-18	-1	1	1	18M01	14	655	10.91	1	1	0	12:53:00	2011	Unidentified
Te18	2011-01-18	-1	1	1	18M01	14	655	10.91	1	1	0	16:28:00	2011	Unidentified
Te13	2010-12-17	-6	2	2	13H01	10	570	9.5	1	1	0	09:08:00	2011	Unidentified
Te13	2010-12-17	-6	2	2	13H01	10	570	9.5	1	1	0	09:15:00	2011	Unidentified
Te13	2010-12-17	-6	2	2	13H01	10	570	9.5	1	1	0	09:33:00	2011	Unidentified
Te13	2010-12-17	-6	2	2	13H01	10	570	9.5	1	1	0	09:34:00	2011	Unidentified
Te13	2010-12-26	-5	1	2	13M01	10	655	10.91	1	1	0	08:53:00	2011	Retama sphaerocarpa
Te13	2010-12-26	-5	1	2	13M01	10	655	10.91	1	0	1	09:16:00	2011	Unidentified
Te13	2010-12-26	-5	1	2	13M01	10	655	10.91	1	1	0	09:21:00	2011	Pistacia lentiscus
Te13	2010-12-26	-5	1	2	13M01	10	655	10.91	1	0	1	09:30:00	2011	Unidentified
Te13	2010-12-26	-5	1	2	13M01	10	655	10.91	1	1	0	09:44:00	2011	Pistacia lentiscus
Te13	2010-12-26	-5	1	2	13M01	10	655	10.91	1	1	0	09:55:00	2011	Pistacia lentiscus
Te13	2010-12-26	-5	1	2	13M01	10	655	10.91	1	1	0	10:07:00	2011	Pistacia lentiscus
Te13	2010-12-26	-5	1	2	13M01	10	655	10.91	1	1	0	10:11:00	2011	Retama sphaerocarpa
Te13	2010-12-26	-5	2	2	13H01	10	655	10.91	1	0	1	09:07:00	2011	Unidentified
Te13	2010-12-26	-5	2	2	13H01	10	655	10.91	1	1	0	09:18:00	2011	Pistacia lentiscus
Te13	2010-12-26	-5	2	2	13H01	10	655	10.91	1	1	0	09:21:00	2011	Pistacia lentiscus
Te13	2010-12-26	-5	2	2	13H01	10	655	10.91	1	0	1	09:27:00	2011	Unidentified
Te13	2010-12-26	-5	2	2	13H01	10	655	10.91	1	0	1	09:41:00	2011	Unidentified
Te13	2010-12-26	-5	2	2	13H01	10	655	10.91	1	1	0	09:44:00	2011	Pistacia lentiscus
Te13	2010-12-26	-5	2	2	13H01	10	655	10.91	1	1	0	09:56:00	2011	Retama sphaerocarpa
Te13	2010-12-26	-5	2	2	13H01	10	655	10.91	1	1	0	10:07:00	2011	Pistacia lentiscus
Te13	2010-12-26	-5	2	2	13H01	10	655	10.91	1	1	0	10:11:00	2011	Retama sphaerocarpa
Te13	2011-01-09	-3	1	1	13M01	10	620	10.33	1	1	0	10:02:00	2011	Retama sphaerocarpa
Te13	2011-01-09	-3	1	1	13M01	10	620	10.33	1	1	0	10:06:00	2011	Retama sphaerocarpa
Te13	2011-01-09	-3	1	1	13M01	10	620	10.33	1	1	0	10:08:00	2011	Retama sphaerocarpa
Te13	2011-01-09	-3	1	1	13M01	10	620	10.33	1	0	1	10:19:00	2011	Unidentified
Te13	2011-01-09	-3	1	1	13M01	10	620	10.33	1	0	1	10:29:00	2011	Unidentified
Te13	2011-01-09	-3	1	1	13M01	10	620	10.33	1	1	0	11:31:00	2011	Pistacia lentiscus
Te13	2011-01-09	-3	1	1	13M01	10	620	10.33	1	1	0	11:35:00	2011	Unidentified
Te13	2011-01-09	-3	1	1	13M01	10	620	10.33	1	1	0	11:43:00	2011	Unidentified
Te13	2011-01-09	-3	1	1	13M01	10	620	10.33	1	1	0	11:45:00	2011	Unidentified
Te13	2011-01-09	-3	1	1	13M01	10	620	10.33	1	0	1	11:52:00	2011	Unidentified
Te13	2011-01-09	-3	2	1	13H01	10	620	10.33	1	1	0	09:58:00	2011	Retama sphaerocarpa
Te13	2011-01-09	-3	2	1	13H01	10	620	10.33	1	1	0	10:00:00	2011	Retama sphaerocarpa
Te13	2011-01-09	-3	2	1	13H01	10	620	10.33	1	1	0	10:05:00	2011	Retama sphaerocarpa
Te13	2011-01-09	-3	2	1	13H01	10	620	10.33	1	1	0	10:07:00	2011	Retama sphaerocarpa
Te13	2011-01-09	-3	2	1	13H01	10	620	10.33	1	1	0	10:11:00	2011	Retama sphaerocarpa
Te13	2011-01-09	-3	2	1	13H01	10	620	10.33	1	1	0	10:17:00	2011	Unidentified
Te13	2011-01-09	-3	2	1	13H01	10	620	10.33	1	1	0	10:27:00	2011	Pinus halepensis
Te13	2011-01-09	-3	2	1	13H01	10	620	10.33	1	0	1	10:30:00	2011	Unidentified
Te13	2011-01-09	-3	2	1	13H01	10	620	10.33	1	1	0	11:31:00	2011	Pistacia lentiscus
Te13	2011-01-09	-3	2	1	13H01	10	620	10.33	1	1	0	11:36:00	2011	Unidentified
Te13	2011-01-09	-3	2	1	13H01	10	620	10.33	1	1	0	11:44:00	2011	Unidentified
Te13	2011-01-15	-2	1	1	13M01	10	645	10.75	1	1	0	11:32:00	2011	Pistacia lentiscus
Te13	2011-01-15	-2	1	1	13M01	10	645	10.75	1	1	0	11:38:00	2011	Pistacia lentiscus
Te13	2011-01-15	-2	1	1	13M01	10	645	10.75	1	1	0	11:41:00	2011	Unidentified
Te13	2011-01-15	-2	1	1	13M01	10	645	10.75	1	1	0	11:48:00	2011	Pistacia lentiscus
Te13	2011-01-15	-2	2	1	13H01	10	645	10.75	1	1	0	10:38:00	2011	Pistacia lentiscus
Te13	2011-01-15	-2	2	1	13H01	10	645	10.75	1	1	0	11:33:00	2011	Pistacia lentiscus
Te13	2011-01-15	-2	2	1	13H01	10	645	10.75	1	1	0	11:38:00	2011	Pistacia lentiscus
Te13	2011-01-15	-2	2	1	13H01	10	645	10.75	1	1	0	11:41:00	2011	Unidentified
Te13	2011-01-15	-2	2	1	13H01	10	645	10.75	1	1	0	11:46:00	2011	Pinus halepensis
Te13	2011-01-22	-1	1	1	13M01	10	675	11.25	1	1	0	14:02:00	2011	Pinus halepensis
Te13	2011-01-22	-1	2	1	13H01	10	675	11.25	1	1	0	18:13:00	2011	Pinus halepensis
Te04	2010-11-08	-13	2	4	04H01	9	630	10.5	1	0	1	15:42:00	2011	Unidentified
Te04	2010-12-07	-9	2	3	04H01	9	600	10	1	0	1	15:37:00	2011	Unidentified
Te04	2010-10-25	-7	1	2	04M01	14	690	11.5	1	1	0	08:51:00	2011	Pinus halepensis
Te04	2010-10-25	-7	1	2	04M01	14	690	11.5	1	0	1	15:08:00	2011	Unidentified
Te04	2010-10-25	-7	2	2	04H01	9	690	11.5	1	1	0	08:52:00	2011	Pinus halepensis
Te04	2010-10-25	-7	2	2	04H01	9	690	11.5	1	1	0	15:10:00	2011	Pinus halepensis
Te04	2010-10-25	-7	2	2	04H01	9	690	11.5	1	0	1	16:01:00	2011	Unidentified
Te04	2010-10-25	-7	2	2	04H01	9	690	11.5	1	0	1	16:02:00	2011	Unidentified
Te04	2010-10-25	-7	2	2	04H01	9	690	11.5	1	1	0	16:05:00	2011	Unidentified
Te04	2011-01-07	-4	1	1	04M01	14	640	10.66	1	1	0	09:00:00	2011	Pinus halepensis
Te04	2011-01-07	-4	1	1	04M01	14	640	10.66	1	0	1	09:17:00	2011	Unidentified
Te04	2011-01-07	-4	2	1	04H01	9	640	10.66	1	1	0	09:02:00	2011	Pinus halepensis
Te04	2011-01-07	-4	2	1	04H01	9	640	10.66	1	1	0	09:15:00	2011	Pinus halepensis
Te04	2011-01-07	-4	2	1	04H01	9	640	10.66	1	1	0	09:28:00	2011	Pinus halepensis
Te04	2011-01-14	-3	1	1	04M01	14	645	10.75	1	1	0	08:48:00	2011	Pinus halepensis
Te04	2011-01-14	-3	1	1	04M01	14	645	10.75	1	1	0	10:08:00	2011	Pinus halepensis
Te04	2011-01-14	-3	2	1	04H01	9	645	10.75	1	1	0	10:10:00	2011	Pinus halepensis
Te04	2011-01-21	-2	1	1	04M01	14	650	10.83	1	1	0	08:23:00	2011	Pinus halepensis
Te04	2011-01-21	-2	1	1	04M01	14	650	10.83	1	1	0	09:01:00	2011	Pinus halepensis
Te04	2011-01-21	-2	1	1	04M01	14	650	10.83	1	1	0	09:04:00	2011	Pinus halepensis
Te04	2011-01-21	-2	1	1	04M01	14	650	10.83	1	1	0	09:08:00	2011	Pinus halepensis
Te04	2011-01-21	-2	1	1	04M01	14	650	10.83	1	0	1	09:12:00	2011	Unidentified
Te04	2011-01-21	-2	1	1	04M01	14	650	10.83	1	1	0	09:16:00	2011	Pinus halepensis
Te04	2011-01-21	-2	1	1	04M01	14	650	10.83	1	1	0	09:23:00	2011	Pinus halepensis
Te04	2011-01-21	-2	1	1	04M01	14	650	10.83	1	1	0	12:38:00	2011	Pinus halepensis
Te04	2011-01-21	-2	2	1	04H01	9	650	10.83	1	1	0	09:03:00	2011	Pinus halepensis
Te04	2011-01-21	-2	2	1	04H01	9	650	10.83	1	0	1	09:07:00	2011	Unidentified
Te04	2011-01-21	-2	2	1	04H01	9	650	10.83	1	0	1	09:11:00	2011	Unidentified
Te04	2011-01-21	-2	2	1	04H01	9	650	10.83	1	1	0	09:19:00	2011	Pinus halepensis
Te04	2011-01-21	-2	2	1	04H01	9	650	10.83	1	0	1	09:32:00	2011	Unidentified
Te04	2011-01-28	-1	1	1	04M01	14	660	11	1	1	0	08:28:00	2011	Pinus halepensis
Te04	2011-01-28	-1	1	1	04M01	14	660	11	1	1	0	15:06:00	2011	Pinus halepensis
Te04	2011-01-28	-1	1	1	04M01	14	660	11	1	1	0	15:09:00	2011	Pistacia lentiscus
Te04	2011-01-28	-1	1	1	04M01	14	660	11	1	1	0	15:16:00	2011	Pistacia lentiscus
Te04	2011-01-28	-1	1	1	04M01	14	660	11	1	1	0	15:22:00	2011	Pinus halepensis
Te04	2011-01-28	-1	1	1	04M01	14	660	11	1	1	0	15:26:00	2011	Pinus halepensis
Te04	2011-01-28	-1	1	1	04M01	14	660	11	1	1	0	16:03:00	2011	Pinus halepensis
Te04	2011-01-28	-1	2	1	04H01	9	660	11	1	1	0	09:05:00	2011	Pinus halepensis
Te29	2010-11-10	-14	2	4	29H01	1	630	10.5	1	0	1	10:50:00	2011	Unidentified
Te29	2010-11-10	-14	2	4	29H01	1	630	10.5	1	0	1	12:19:00	2011	Unidentified
Te29	2011-01-07	-6	1	2	29M01	5	645	10.75	1	1	0	13:35:00	2011	Pinus halepensis
Te29	2011-01-07	-6	1	2	29M01	5	645	10.75	1	1	0	15:47:00	2011	Pistacia lentiscus
Te29	2011-01-07	-6	2	2	29H01	1	645	10.75	1	1	0	13:36:00	2011	Pinus halepensis
Te29	2011-01-07	-6	2	2	29H01	1	645	10.75	1	1	0	15:30:00	2011	Unidentified
Te29	2011-01-07	-6	2	2	29H01	1	645	10.75	1	1	0	15:46:00	2011	Pistacia lentiscus
Te29	2011-01-13	-5	1	2	29M01	5	645	10.75	1	0	1	08:29:00	2011	Unidentified
Te29	2011-01-13	-5	1	2	29M01	5	645	10.75	1	1	0	10:52:00	2011	Pinus halepensis
Te29	2011-01-13	-5	2	2	29H01	1	645	10.75	1	1	0	10:52:00	2011	Pinus halepensis
Te29	2011-01-21	-4	1	1	29M01	5	660	11	1	1	0	11:45:00	2011	Pinus halepensis
Te29	2011-01-21	-4	1	1	29M01	5	660	11	1	1	0	11:50:00	2011	Unidentified
Te29	2011-01-21	-4	1	1	29M01	5	660	11	1	1	0	11:55:00	2011	Pinus halepensis
Te29	2011-01-21	-4	2	1	29H01	1	660	11	1	0	1	11:26:00	2011	Unidentified
Te29	2011-01-21	-4	2	1	29H01	1	660	11	1	1	0	11:41:00	2011	Pinus halepensis
Te29	2011-01-28	-3	1	1	29M01	5	645	10.75	1	1	0	14:14:00	2011	Pinus halepensis
Te29	2011-01-28	-3	1	1	29M01	5	645	10.75	1	1	0	14:50:00	2011	Pinus halepensis
Te29	2011-01-28	-3	1	1	29M01	5	645	10.75	1	1	0	15:46:00	2011	Unidentified
Te29	2011-01-28	-3	2	1	29H01	1	645	10.75	1	1	0	14:13:00	2011	Pinus halepensis
Te29	2011-01-28	-3	2	1	29H01	1	645	10.75	1	1	0	14:15:00	2011	Pinus halepensis
Te29	2011-01-28	-3	2	1	29H01	1	645	10.75	1	1	0	14:19:00	2011	Pinus halepensis
Te29	2011-01-28	-3	2	1	29H01	1	645	10.75	1	1	0	14:49:00	2011	Pinus halepensis
Te29	2011-02-04	-2	1	1	29M01	5	665	11.08	1	1	0	13:18:00	2011	Retama sphaerocarpa
Te29	2011-02-04	-2	1	1	29M01	5	665	11.08	1	1	0	13:51:00	2011	Pistacia lentiscus
Te29	2011-02-04	-2	2	1	29H01	1	665	11.08	1	1	0	14:15:00	2011	Pinus halepensis
Te29	2011-02-08	-1	1	1	29M01	5	675	11.25	1	1	0	11:20:00	2011	Pinus halepensis
Te29	2011-02-08	-1	1	1	29M01	5	675	11.25	1	1	0	11:22:00	2011	Pinus halepensis
Te29	2011-02-08	-1	1	1	29M01	5	675	11.25	1	1	0	16:14:00	2011	Pinus halepensis
Te29	2011-02-08	-1	1	1	29M01	5	675	11.25	1	1	0	17:04:00	2011	Retama sphaerocarpa
T29	2011-02-08	-1	2	1	29H01	1	675	11.25	1	1	0	13:04:00	2011	Pinus halepensis
Te30	2011-10-21	-16	1	4	30M01	3	759	12.65	1	0	1	10:35:00	2012	Unidentified
Te30	2011-10-21	-16	1	4	30M01	3	759	12.65	1	0	1	10:36:00	2012	Unidentified
Te30	2011-10-21	-16	1	4	30M01	3	759	12.65	1	1	0	10:37:00	2012	Retama sphaerocarpa
Te30	2011-10-21	-16	1	4	30M01	3	759	12.65	1	0	1	10:38:00	2012	Unidentified
Te30	2011-10-21	-16	1	4	30M01	3	759	12.65	1	0	1	10:40:00	2012	Unidentified
Te30	2011-10-21	-16	1	4	30M01	3	759	12.65	1	0	1	10:41:00	2012	Stipa tenacissima
Te30	2011-10-21	-16	1	4	30M01	3	759	12.65	1	0	1	10:44:00	2012	Unidentified
Te30	2011-10-21	-16	1	4	30M01	3	759	12.65	1	0	1	10:45:00	2012	Unidentified
Te30	2011-10-21	-16	1	4	30M01	3	759	12.65	1	0	1	10:47:00	2012	Unidentified
Te30	2011-10-21	-16	2	4	30H01	5	759	12.65	1	0	1	10:36:00	2012	Unidentified
Te30	2011-10-21	-16	2	4	30H01	5	759	12.65	1	0	1	10:37:00	2012	Unidentified
Te30	2011-10-21	-16	2	4	30H01	5	759	12.65	1	0	1	10:39:00	2012	Unidentified
Te30	2011-10-21	-16	2	4	30H01	5	759	12.65	1	0	1	10:42:00	2012	Unidentified
Te30	2011-10-21	-16	2	4	30H01	5	759	12.65	1	0	1	10:45:00	2012	Unidentified
Te30	2011-10-28	-15	1	4	30M01	3	692	11.53	1	1	0	09:49:00	2012	Stipa tenacissima
Te30	2011-10-28	-15	1	4	30M01	3	692	11.53	1	1	0	09:50:00	2012	Retama sphaerocarpa
Te30	2011-10-28	-15	1	4	30M01	3	692	11.53	1	0	1	09:51:00	2012	Unidentified
Te30	2011-10-28	-15	1	4	30M01	3	692	11.53	1	0	1	09:52:00	2012	Stipa tenacissima
Te30	2011-10-28	-15	1	4	30M01	3	692	11.53	1	0	1	09:54:00	2012	Unidentified
Te30	2011-10-28	-15	1	4	30M01	3	692	11.53	1	0	1	10:03:00	2012	Unidentified
Te30	2011-10-28	-15	1	4	30M01	3	692	11.53	1	1	0	10:05:00	2012	Retama sphaerocarpa
Te30	2011-10-28	-15	2	4	30H01	5	692	11.53	1	1	0	09:49:00	2012	Pinus halepensis
Te30	2011-10-28	-15	2	4	30H01	5	692	11.53	1	0	1	09:51:00	2012	Unidentified
Te30	2011-10-28	-15	2	4	30H01	5	692	11.53	1	1	0	09:53:00	2012	Stipa tenacissima
Te30	2011-10-28	-15	2	4	30H01	5	692	11.53	1	0	1	10:04:00	2012	Unidentified
Te30	2011-11-10	-14	1	4	30M01	3	690	11.5	1	0	1	12:09:00	2012	Unidentified
Te30	2011-11-10	-14	1	4	30M01	3	690	11.5	1	1	0	12:14:00	2012	Retama sphaerocarpa
Te30	2011-11-10	-14	1	4	30M01	3	690	11.5	1	0	1	12:43:00	2012	Unidentified
Te30	2011-11-10	-14	1	4	30M01	3	690	11.5	1	1	0	12:47:00	2012	Stipa tenacissima
Te30	2011-11-10	-14	1	4	30M01	3	690	11.5	1	1	0	12:51:00	2012	Pinus halepensis
Te30	2011-11-10	-14	2	4	30H01	5	690	11.5	1	0	1	12:10:00	2012	Unidentified
Te30	2011-11-10	-14	2	4	30H01	5	690	11.5	1	0	1	12:14:00	2012	Unidentified
Te30	2011-11-10	-14	2	4	30H01	5	690	11.5	1	0	1	12:42:00	2012	Unidentified
Te30	2011-11-21	-12	1	3	30M01	3	675	11.25	1	0	1	14:14:00	2012	Unidentified
Te30	2011-11-21	-12	2	3	30H01	5	675	11.25	1	1	0	14:06:00	2012	Unidentified
Te30	2011-11-21	-12	2	3	30H01	5	675	11.25	1	0	1	14:12:00	2012	Unidentified
Te30	2011-12-27	-7	1	2	30M01	3	555	9.25	1	1	0	10:21:00	2012	Unidentified
Te30	2011-12-27	-7	1	2	30M01	3	555	9.25	1	1	0	11:41:00	2012	Unidentified
Te30	2011-12-27	-7	2	2	30H01	5	555	9.25	1	1	0	10:20:00	2012	Unidentified
Te30	2011-12-27	-7	2	2	30H01	5	555	9.25	1	1	0	10:40:00	2012	Unidentified
Te30	2012-01-03	-6	2	2	30H01	5	615	10.25	1	0	1	14:00:00	2012	Unidentified
Te30	2012-01-10	-5	1	2	30M01	3	630	10.5	1	0	1	10:31:00	2012	Unidentified
Te30	2012-01-10	-5	1	2	30M01	3	630	10.5	1	1	0	10:35:00	2012	Retama sphaerocarpa
Te30	2012-01-10	-5	1	2	30M01	3	630	10.5	1	1	0	10:41:00	2012	Retama sphaerocarpa
Te30	2012-01-10	-5	1	2	30M01	3	630	10.5	1	0	1	15:28:00	2012	Unidentified
Te30	2012-01-10	-5	1	2	30M01	3	630	10.5	1	1	0	15:37:00	2012	Retama sphaerocarpa
Te30	2012-01-10	-5	1	2	30M01	3	630	10.5	1	0	1	15:42:00	2012	Unidentified
Te30	2012-01-10	-5	1	2	30M01	3	630	10.5	1	0	1	15:49:00	2012	Unidentified
Te30	2012-01-10	-5	1	2	30M01	3	630	10.5	1	0	1	15:59:00	2012	Unidentified
Te30	2012-01-10	-5	1	2	30M01	3	630	10.5	1	0	1	16:02:00	2012	Unidentified
Te30	2012-01-10	-5	2	2	30H01	5	630	10.5	1	1	0	10:30:00	2012	Unidentified
Te30	2012-01-10	-5	2	2	30H01	5	630	10.5	1	1	0	10:32:00	2012	Unidentified
Te30	2012-01-10	-5	2	2	30H01	5	630	10.5	1	1	0	10:36:00	2012	Pinus halepensis
Te30	2012-01-10	-5	2	2	30H01	5	630	10.5	1	1	0	10:46:00	2012	Pinus halepensis
Te30	2012-01-10	-5	2	2	30H01	5	630	10.5	1	1	0	15:43:00	2012	Pinus halepensis
Te30	2012-01-10	-5	2	2	30H01	5	630	10.5	1	1	0	15:50:00	2012	Anthyllis cytisoides
Te30	2012-01-10	-5	2	2	30H01	5	630	10.5	1	1	0	15:54:00	2012	Pinus halepensis
Te30	2012-01-10	-5	2	2	30H01	5	630	10.5	1	0	1	15:59:00	2012	Unidentified
Te30	2012-01-10	-5	2	2	30H01	5	630	10.5	1	1	0	16:02:00	2012	Pinus halepensis
Te30	2012-01-25	-3	1	1	30M01	3	600	10	1	1	0	14:34:00	2012	Pinus halepensis
Te30	2012-01-25	-3	1	1	30M01	3	600	10	1	1	0	14:38:00	2012	Pinus halepensis
Te30	2012-01-25	-3	1	1	30M01	3	600	10	1	1	0	14:40:00	2012	Unidentified
Te30	2012-01-25	-3	1	1	30M01	3	600	10	1	0	1	14:47:00	2012	Unidentified
Te30	2012-01-25	-3	2	1	30H01	5	600	10	1	1	0	14:36:00	2012	Pinus halepensis
Te30	2012-01-25	-3	2	1	30H01	5	600	10	1	1	0	14:41:00	2012	Pinus halepensis
Te30	2012-02-01	-2	1	1	30M01	3	570	9.5	1	0	1	12:16:00	2012	Unidentified
Te30	2012-02-01	-2	1	1	30M01	3	570	9.5	1	0	1	12:18:00	2012	Unidentified
Te03	2011-10-20	-15	1	4	03M01	10	761	12.68	1	0	1	10:01:00	2012	Unidentified
Te03	2011-10-20	-15	1	4	03M01	10	761	12.68	1	0	1	10:02:00	2012	Unidentified
Te03	2011-10-20	-15	1	4	03M01	10	761	12.68	1	0	1	10:03:00	2012	Unidentified
Te03	2011-10-20	-15	1	4	03M01	10	761	12.68	1	0	1	10:04:00	2012	Unidentified
Te03	2011-10-20	-15	1	4	03M01	10	761	12.68	1	0	1	10:06:00	2012	Unidentified
Te03	2011-10-20	-15	1	4	03M01	10	761	12.68	1	0	1	10:07:00	2012	Unidentified
Te03	2011-10-20	-15	1	4	03M01	10	761	12.68	1	0	1	10:09:00	2012	Unidentified
Te03	2011-10-20	-15	1	4	03M01	10	761	12.68	1	0	1	10:10:00	2012	Unidentified
Te03	2011-10-20	-15	1	4	03M01	10	761	12.68	1	0	1	10:11:00	2012	Unidentified
Te03	2011-10-20	-15	1	4	03M01	10	761	12.68	1	0	1	10:13:00	2012	Unidentified
Te03	2011-10-20	-15	2	4	03H01	11	761	12.68	1	0	1	10:02:00	2012	Unidentified
Te03	2011-10-20	-15	2	4	03H01	11	761	12.68	1	0	1	10:02:00	2012	Unidentified
Te03	2011-10-20	-15	2	4	03H01	11	761	12.68	1	1	0	10:03:00	2012	Pinus halepensis
Te03	2011-10-20	-15	2	4	03H01	11	761	12.68	1	0	1	10:05:00	2012	Unidentified
Te03	2011-10-20	-15	2	4	03H01	11	761	12.68	1	0	1	10:06:00	2012	Unidentified
Te03	2011-10-20	-15	2	4	03H01	11	761	12.68	1	0	1	10:07:00	2012	Unidentified
Te03	2011-10-20	-15	2	4	03H01	11	761	12.68	1	0	1	10:11:00	2012	Unidentified
Te03	2011-10-24	-14	1	4	03M01	10	691	11.51	1	0	1	11:16:00	2012	Unidentified
Te03	2011-10-24	-14	1	4	03M01	10	691	11.51	1	0	1	11:17:00	2012	Unidentified
Te03	2011-10-24	-14	1	4	03M01	10	691	11.51	1	0	1	11:20:00	2012	Unidentified
Te03	2011-10-24	-14	1	4	03M01	10	691	11.51	1	0	1	11:22:00	2012	Unidentified
Te03	2011-10-24	-14	1	4	03M01	10	691	11.51	1	0	1	11:24:00	2012	Unidentified
Te03	2011-10-24	-14	1	4	03M01	10	691	11.51	1	1	0	11:25:00	2012	Pinus halepensis
Te03	2011-10-24	-14	1	4	03M01	10	691	11.51	1	1	0	11:26:00	2012	Pinus halepensis
Te03	2011-10-24	-14	1	4	03M01	10	691	11.51	1	0	1	11:28:00	2012	Unidentified
Te03	2011-10-24	-14	1	4	03M01	10	691	11.51	1	0	1	11:29:00	2012	Unidentified
Te03	2011-10-24	-14	1	4	03M01	10	691	11.51	1	0	1	11:31:00	2012	Unidentified
Te03	2011-10-24	-14	2	4	03H01	11	691	11.51	1	1	0	11:16:00	2012	Pinus halepensis
Te03	2011-10-24	-14	2	4	03H01	11	691	11.51	1	1	0	11:17:00	2012	Pinus halepensis
Te03	2011-10-24	-14	2	4	03H01	11	691	11.51	1	0	1	11:21:00	2012	Unidentified
Te03	2011-10-24	-14	2	4	03H01	11	691	11.51	1	1	0	11:23:00	2012	Pinus halepensis
Te03	2011-10-24	-14	2	4	03H01	11	691	11.51	1	0	1	11:26:00	2012	Unidentified
Te03	2011-10-24	-14	2	4	03H01	11	691	11.51	1	0	1	11:28:00	2012	Unidentified
Te03	2011-10-24	-14	2	4	03H01	11	691	11.51	1	0	1	11:30:00	2012	Unidentified
Te03	2011-11-08	-12	1	3	03M01	10	690	11.5	1	0	1	10:38:00	2012	Unidentified
Te03	2011-11-08	-12	1	3	03M01	10	690	11.5	1	0	1	10:45:00	2012	Unidentified
Te03	2011-11-08	-12	1	3	03M01	10	690	11.5	1	0	1	10:49:00	2012	Unidentified
Te03	2011-11-08	-12	1	3	03M01	10	690	11.5	1	0	1	10:54:00	2012	Unidentified
Te03	2011-11-08	-12	2	3	03H01	11	690	11.5	1	1	0	10:33:00	2012	Unidentified
Te03	2011-11-08	-12	2	3	03H01	11	690	11.5	1	1	0	10:37:00	2012	Unidentified
Te03	2011-11-08	-12	2	3	03H01	11	690	11.5	1	0	1	10:42:00	2012	Unidentified
Te03	2011-11-08	-12	2	3	03H01	11	690	11.5	1	1	0	10:49:00	2012	Unidentified
Te03	2011-11-08	-12	2	3	03H01	11	690	11.5	1	1	0	10:53:00	2012	Unidentified
Te03	2011-11-08	-12	2	3	03H01	11	690	11.5	1	1	0	11:01:00	2012	Pinus halepensis
Te03	2011-11-14	-11	1	3	03M01	10	690	11.5	1	1	0	09:19:00	2012	Pinus halepensis
Te03	2011-11-14	-11	1	3	03M01	10	690	11.5	1	0	1	09:27:00	2012	Unidentified
Te03	2011-11-14	-11	2	3	03H01	11	690	11.5	1	1	0	09:21:00	2012	Pinus halepensis
Te03	2011-11-14	-11	2	3	03H01	11	690	11.5	1	1	0	09:32:00	2012	Pinus halepensis
Te03	2011-12-05	-8	2	2	03H01	11	615	10.25	1	0	1	09:20:00	2012	Pinus halepensis
Te03	2011-12-19	-6	1	2	03M01	10	660	11	1	0	1	10:14:00	2012	Stipa tenacissima
Te03	2011-12-19	-6	2	2	03H01	11	660	11	1	1	0	08:11:00	2012	Unidentified
Te03	2011-12-19	-6	2	2	03H01	11	660	11	1	0	1	10:03:00	2012	Stipa tenacissima
Te03	2011-12-19	-6	2	2	03H01	11	660	11	1	0	1	10:06:00	2012	Stipa tenacissima
Te03	2011-12-19	-6	2	2	03H01	11	660	11	1	0	1	12:03:00	2012	Unidentified
Te03	2011-12-19	-6	2	2	03H01	11	660	11	1	0	1	12:11:00	2012	Unidentified
Te03	2011-12-26	-5	1	2	03M01	10	645	10.75	1	1	0	09:23:00	2012	Unidentified
Te03	2011-12-26	-5	1	2	03M01	10	645	10.75	1	1	0	09:29:00	2012	Unidentified
Te03	2011-12-26	-5	1	2	03M01	10	645	10.75	1	1	0	09:39:00	2012	Unidentified
Te03	2011-12-26	-5	1	2	03M01	10	645	10.75	1	1	0	09:42:00	2012	Unidentified
Te03	2011-12-26	-5	1	2	03M01	10	645	10.75	1	1	0	09:45:00	2012	Unidentified
Te03	2011-12-26	-5	1	2	03M01	10	645	10.75	1	1	0	10:06:00	2012	Unidentified
Te03	2011-12-26	-5	1	2	03M01	10	645	10.75	1	1	0	10:40:00	2012	Pinus halepensis
Te03	2011-12-26	-5	2	2	03H01	11	645	10.75	1	0	1	09:03:00	2012	Unidentified
Te03	2011-12-26	-5	2	2	03H01	11	645	10.75	1	1	0	09:44:00	2012	Unidentified
Te03	2011-12-26	-5	2	2	03H01	11	645	10.75	1	1	0	09:49:00	2012	Unidentified
Te03	2011-12-26	-5	2	2	03H01	11	645	10.75	1	1	0	10:12:00	2012	Unidentified
Te03	2012-01-02	-4	2	1	03H01	11	630	10.5	1	1	0	09:35:00	2012	Pinus halepensis
Te03	2012-01-09	-3	1	1	03M01	10	630	10.5	1	1	0	08:11:00	2012	Unidentified
Te03	2012-01-09	-3	1	1	03M01	10	630	10.5	1	1	0	09:13:00	2012	Retama sphaerocarpa
Te03	2012-01-09	-3	1	1	03M01	10	630	10.5	1	1	0	09:26:00	2012	Retama sphaerocarpa
Te03	2012-01-09	-3	2	1	03H01	11	630	10.5	1	1	0	08:09:00	2012	Unidentified
Te03	2012-01-09	-3	2	1	03H01	11	630	10.5	1	0	1	09:30:00	2012	Chamaerops humilis
Te03	2012-01-19	-2	1	1	03M01	10	630	10.5	1	1	0	08:22:00	2012	Unidentified
Te03	2012-01-19	-2	1	1	03M01	10	630	10.5	1	1	0	09:10:00	2012	Pinus halepensis
Te03	2012-01-19	-2	1	1	03M01	10	630	10.5	1	0	1	09:14:00	2012	Chamaerops humilis
Te03	2012-01-19	-2	1	1	03M01	10	630	10.5	1	0	1	10:18:00	2012	Chamaerops humilis
Te03	2012-01-19	-2	2	1	03H01	11	630	10.5	1	0	1	09:07:00	2012	Chamaerops humilis
Te03	2012-01-19	-2	2	1	03H01	11	630	10.5	1	1	0	09:27:00	2012	Pinus halepensis
Te03	2012-01-19	-2	2	1	03H01	11	630	10.5	1	0	1	10:22:00	2012	Chamaerops humilis
Te03	2012-01-23	-1	1	1	03M01	10	645	10.75	1	1	0	08:58:00	2012	Unidentified
Te03	2012-01-23	-1	1	1	03M01	10	645	10.75	1	0	1	09:07:00	2012	Unidentified
Te03	2012-01-23	-1	1	1	03M01	10	645	10.75	1	0	1	09:16:00	2012	Chamaerops humilis
Te03	2012-01-23	-1	1	1	03M01	10	645	10.75	1	1	0	11:50:00	2012	Unidentified
Te03	2012-01-23	-1	1	1	03M01	10	645	10.75	1	1	0	11:52:00	2012	Pinus halepensis
Te03	2012-01-23	-1	1	1	03M01	10	645	10.75	1	1	0	11:57:00	2012	Pinus halepensis
Te03	2012-01-23	-1	1	1	03M01	10	645	10.75	1	1	0	12:02:00	2012	Pinus halepensis
Te03	2012-01-23	-1	1	1	03M01	10	645	10.75	1	0	1	12:04:00	2012	Chamaerops humilis
Te03	2012-01-23	-1	1	1	03M01	10	645	10.75	1	1	0	12:07:00	2012	Pinus halepensis
Te03	2012-01-23	-1	1	1	03M01	10	645	10.75	1	1	0	12:15:00	2012	Pinus halepensis
Te03	2012-01-23	-1	1	1	03M01	10	645	10.75	1	1	0	12:17:00	2012	Pinus halepensis
Te03	2012-01-23	-1	1	1	03M01	10	645	10.75	1	1	0	12:21:00	2012	Pinus halepensis
Te03	2012-01-23	-1	1	1	03M01	10	645	10.75	1	1	0	12:25:00	2012	Pinus halepensis
Te03	2012-01-23	-1	1	1	03M01	10	645	10.75	1	1	0	14:20:00	2012	Pinus halepensis
Te03	2012-01-23	-1	1	1	03M01	10	645	10.75	1	1	0	14:40:00	2012	Pinus halepensis
Te03	2012-01-23	-1	1	1	03M01	10	645	10.75	1	0	1	14:46:00	2012	Unidentified
Te03	2012-01-23	-1	1	1	03M01	10	645	10.75	1	1	0	14:49:00	2012	Pinus halepensis
Te03	2012-01-23	-1	2	1	03H01	11	645	10.75	1	0	1	09:14:00	2012	Chamaerops humilis
Te03	2012-01-23	-1	2	1	03H01	11	645	10.75	1	0	1	11:57:00	2012	Chamaerops humilis
Te03	2012-01-23	-1	2	1	03H01	11	645	10.75	1	0	1	12:11:00	2012	Chamaerops humilis
Te03	2012-01-23	-1	2	1	03H01	11	645	10.75	1	1	0	14:42:00	2012	Pinus halepensis
Te14	2013-10-21	-15	1	4	14M01	13	660	11	1	0	1	10:02:00	2014	Unidentified
Te14	2013-10-21	-15	1	4	14M01	13	660	11	1	0	1	10:05:00	2014	Unidentified
Te14	2013-10-21	-15	1	4	14M01	13	660	11	1	1	0	10:09:00	2014	Pinus halepensis
Te14	2013-10-21	-15	1	4	14M01	13	660	11	1	0	1	11:03:00	2014	Unidentified
Te14	2013-10-21	-15	1	4	14M01	13	660	11	1	0	1	12:02:00	2014	Unidentified
Te14	2013-10-21	-15	2	4	14H01	16	660	11	1	0	1	10:04:00	2014	Unidentified
Te14	2013-10-21	-15	2	4	14H01	16	660	11	1	0	1	10:05:00	2014	Unidentified
Te14	2013-11-04	-13	1	4	14M01	13	660	11	1	0	1	09:07:00	2014	Unidentified
Te14	2013-11-04	-13	1	4	14M01	13	660	11	1	0	1	09:08:00	2014	Unidentified
Te14	2013-11-04	-13	1	4	14M01	13	660	11	1	0	1	09:10:00	2014	Unidentified
Te14	2013-11-04	-13	1	4	14M01	13	660	11	1	0	1	09:16:00	2014	Unidentified
Te14	2013-11-04	-13	1	4	14M01	13	660	11	1	0	1	09:17:00	2014	Unidentified
Te14	2013-11-04	-13	1	4	14M01	13	660	11	1	0	1	09:18:00	2014	Unidentified
Te14	2013-11-04	-13	1	4	14M01	13	660	11	1	0	1	09:20:00	2014	Unidentified
Te14	2013-11-04	-13	1	4	14M01	13	660	11	1	1	0	09:26:00	2014	Pinus halepensis
Te14	2013-11-04	-13	1	4	14M01	13	660	11	1	1	0	09:27:00	2014	Pinus halepensis
Te14	2013-11-04	-13	1	4	14M01	13	660	11	1	0	1	09:32:00	2014	Unidentified
Te14	2013-11-04	-13	1	4	14M01	13	660	11	1	0	1	09:51:00	2014	Unidentified
Te14	2013-11-04	-13	1	4	14M01	13	660	11	1	0	1	09:52:00	2014	Unidentified
Te14	2013-11-04	-13	2	4	14H01	16	660	11	1	1	0	09:05:00	2014	Pinus halepensis
Te14	2013-11-04	-13	2	4	14H01	16	660	11	1	0	1	09:09:00	2014	Unidentified
Te14	2013-11-04	-13	2	4	14H01	16	660	11	1	1	0	09:15:00	2014	Pinus halepensis
Te14	2013-11-04	-13	2	4	14H01	16	660	11	1	0	1	09:29:00	2014	Unidentified
Te14	2013-11-11	-12	1	3	14M01	13	660	11	1	0	1	11:14:00	2014	Unidentified
Te14	2013-11-11	-12	1	3	14M01	13	660	11	1	1	0	11:15:00	2014	Pinus halepensis
Te14	2013-11-11	-12	1	3	14M01	13	660	11	1	0	1	11:23:00	2014	Unidentified
Te14	2013-11-11	-12	1	3	14M01	13	660	11	1	0	1	11:25:00	2014	Unidentified
Te14	2013-11-11	-12	1	3	14M01	13	660	11	1	1	0	11:51:00	2014	Pinus halepensis
Te14	2013-11-11	-12	1	3	14M01	13	660	11	1	1	0	11:52:00	2014	Pinus halepensis
Te14	2013-11-11	-12	1	3	14M01	13	660	11	1	1	0	11:53:00	2014	Pinus halepensis
Te14	2013-11-11	-12	1	3	14M01	13	660	11	1	0	1	11:59:00	2014	Unidentified
Te14	2013-11-11	-12	1	3	14M01	13	660	11	1	0	1	12:00:00	2014	Unidentified
Te14	2013-11-11	-12	1	3	14M01	13	660	11	1	0	1	12:02:00	2014	Unidentified
Te14	2013-11-11	-12	1	3	14M01	13	660	11	1	0	1	12:04:00	2014	Unidentified
Te14	2013-11-11	-12	2	3	14H01	16	660	11	1	0	1	11:14:00	2014	Unidentified
Te14	2013-11-11	-12	2	3	14H01	16	660	11	1	0	1	11:17:00	2014	Unidentified
Te14	2013-11-11	-12	2	3	14H01	16	660	11	1	1	0	11:25:00	2014	Pinus halepensis
Te14	2013-11-11	-12	2	3	14H01	16	660	11	1	0	1	11:29:00	2014	Unidentified
Te14	2013-11-11	-12	2	3	14H01	16	660	11	1	1	0	11:32:00	2014	Pinus halepensis
Te14	2013-12-02	-9	1	3	14M01	13	660	11	1	1	0	10:40:00	2014	Pinus halepensis
Te14	2013-12-02	-9	1	3	14M01	13	660	11	1	0	1	10:41:00	2014	Unidentified
Te14	2013-12-02	-9	1	3	14M01	13	660	11	1	0	1	10:47:00	2014	Unidentified
Te14	2013-12-02	-9	1	3	14M01	13	660	11	1	1	0	10:48:00	2014	Pinus halepensis
Te14	2013-12-02	-9	1	3	14M01	13	660	11	1	1	0	10:49:00	2014	Pinus halepensis
Te14	2013-12-02	-9	1	3	14M01	13	660	11	1	0	1	10:52:00	2014	Unidentified
Te14	2013-12-02	-9	1	3	14M01	13	660	11	1	0	1	11:22:00	2014	Unidentified
Te14	2013-12-02	-9	1	3	14M01	13	660	11	1	1	0	16:09:00	2014	Pinus halepensis
Te14	2013-12-02	-9	1	3	14M01	13	660	11	1	1	0	16:11:00	2014	Pinus halepensis
Te14	2013-12-02	-9	1	3	14M01	13	660	11	1	1	0	16:17:00	2014	Pinus halepensis
Te14	2013-12-02	-9	1	3	14M01	13	660	11	1	1	0	16:21:00	2014	Pinus halepensis
Te14	2013-12-02	-9	1	3	14M01	13	660	11	1	1	0	16:41:00	2014	Pinus halepensis
Te14	2013-12-02	-9	1	3	14M01	13	660	11	1	1	0	16:43:00	2014	Pinus halepensis
Te14	2013-12-02	-9	1	3	14M01	13	660	11	1	1	0	17:02:00	2014	Pinus halepensis
Te14	2013-12-02	-9	1	3	14M01	13	660	11	1	0	1	17:06:00	2014	Unidentified
Te14	2013-12-02	-9	2	3	14H01	16	660	11	1	1	0	10:40:00	2014	Pinus halepensis
Te14	2013-12-02	-9	2	3	14H01	16	660	11	1	1	0	10:49:00	2014	Pinus halepensis
Te14	2013-12-02	-9	2	3	14H01	16	660	11	1	0	1	11:20:00	2014	Unidentified
Te14	2013-12-02	-9	2	3	14H01	16	660	11	1	1	0	16:12:00	2014	Pinus halepensis
Te14	2013-12-02	-9	2	3	14H01	16	660	11	1	1	0	16:20:00	2014	Pinus halepensis
Te14	2013-12-02	-9	2	3	14H01	16	660	11	1	1	0	16:21:00	2014	Pinus halepensis
Te14	2013-12-02	-9	2	3	14H01	16	660	11	1	1	0	16:40:00	2014	Pinus halepensis
Te14	2013-12-02	-9	2	3	14H01	16	660	11	1	1	0	16:43:00	2014	Pinus halepensis
Te14	2013-12-02	-9	2	3	14H01	16	660	11	1	1	0	17:04:00	2014	Pinus halepensis
Te14	2013-12-31	-5	1	2	14M01	13	600	10	1	1	0	11:14:00	2014	Pinus halepensis
Te14	2013-12-31	-5	1	2	14M01	13	600	10	1	0	1	11:19:00	2014	Unidentified
Te14	2013-12-31	-5	1	2	14M01	13	600	10	1	0	1	11:20:00	2014	Unidentified
Te14	2013-12-31	-5	1	2	14M01	13	600	10	1	1	0	11:25:00	2014	Pinus halepensis
Te14	2013-12-31	-5	1	2	14M01	13	600	10	1	1	0	11:28:00	2014	Pinus halepensis
Te14	2013-12-31	-5	1	2	14M01	13	600	10	1	0	1	11:29:00	2014	Unidentified
Te14	2013-12-31	-5	1	2	14M01	13	600	10	1	1	0	11:32:00	2014	Pinus halepensis
Te14	2013-12-31	-5	1	2	14M01	13	600	10	1	0	1	11:35:00	2014	Unidentified
Te14	2013-12-31	-5	1	2	14M01	13	600	10	1	0	1	11:37:00	2014	Unidentified
Te14	2013-12-31	-5	1	2	14M01	13	600	10	1	0	1	11:51:00	2014	Unidentified
Te14	2013-12-31	-5	1	2	14M01	13	600	10	1	1	0	16:17:00	2014	Pinus halepensis
Te14	2013-12-31	-5	1	2	14M01	13	600	10	1	1	0	16:20:00	2014	Pinus halepensis
Te14	2013-12-31	-5	1	2	14M01	13	600	10	1	1	0	16:24:00	2014	Pinus halepensis
Te14	2013-12-31	-5	1	2	14M01	13	600	10	1	1	0	16:25:00	2014	Pinus halepensis
Te14	2013-12-31	-5	1	2	14M01	13	600	10	1	1	0	16:30:00	2014	Pinus halepensis
Te14	2013-12-31	-5	1	2	14M01	13	600	10	1	1	0	16:37:00	2014	Pinus halepensis
Te14	2013-12-31	-5	2	2	14H01	16	600	10	1	1	0	11:14:00	2014	Pinus halepensis
Te14	2013-12-31	-5	2	2	14H01	16	600	10	1	0	1	11:26:00	2014	Unidentified
Te14	2013-12-31	-5	2	2	14H01	16	600	10	1	1	0	11:51:00	2014	Pinus halepensis
Te14	2013-12-31	-5	2	2	14H01	16	600	10	1	0	1	16:17:00	2014	Unidentified
Te14	2013-12-31	-5	2	2	14H01	16	600	10	1	1	0	16:32:00	2014	Pinus halepensis
Te14	2013-12-31	-5	2	2	14H01	16	600	10	1	1	0	16:33:00	2014	Pinus halepensis
Te14	2013-12-31	-5	2	2	14H01	16	600	10	1	1	0	16:36:00	2014	Pinus halepensis
Te14	2013-12-31	-5	2	2	14H01	16	600	10	1	1	0	16:44:00	2014	Pinus halepensis
Te14	2014-01-06	-4	1	1	14M01	13	600	10	1	1	0	16:01:00	2014	Pinus halepensis
Te14	2014-01-06	-4	1	1	14M01	13	600	10	1	1	0	16:09:00	2014	Pinus halepensis
Te14	2014-01-06	-4	2	1	14H01	16	600	10	1	1	0	16:02:00	2014	Pinus halepensis
Te14	2014-01-06	-4	2	1	14H01	16	600	10	1	1	0	16:07:00	2014	Pinus halepensis
Te14	2014-01-23	-2	1	1	14M01	13	600	10	1	1	0	12:41:00	2014	Pinus halepensis
Te14	2014-01-23	-2	1	1	14M01	13	600	10	1	1	0	12:44:00	2014	Unidentified
Te14	2014-01-23	-2	1	1	14M01	13	600	10	1	1	0	12:48:00	2014	Pinus halepensis
Te14	2014-01-23	-2	1	1	14M01	13	600	10	1	1	0	12:52:00	2014	Pinus halepensis
Te14	2014-01-23	-2	1	1	14M01	13	600	10	1	1	0	17:44:00	2014	Pinus halepensis
Te14	2014-01-23	-2	2	1	14H01	16	600	10	1	1	0	12:49:00	2014	Pinus halepensis
Te14	2014-01-23	-2	2	1	14H01	16	600	10	1	1	0	17:45:00	2014	Pinus halepensis
Te14	2014-01-29	-1	1	1	14M01	13	600	10	1	1	0	16:38:00	2014	Pinus halepensis
Te14	2014-01-29	-1	2	1	14H01	16	600	10	1	1	0	16:40:00	2014	Pinus halepensis
Te16	2013-10-26	-15	1	4	16M01	13	660	11	1	0	1	10:07:00	2014	Unidentified
Te16	2013-10-26	-15	1	4	16M01	13	660	11	1	0	1	10:11:00	2014	Unidentified
Te16	2013-10-26	-15	1	4	16M01	13	660	11	1	1	0	10:15:00	2014	Pinus halepensis
Te16	2013-10-26	-15	1	4	16M01	13	660	11	1	0	1	10:23:00	2014	Unidentified
Te16	2013-10-26	-15	1	4	16M01	13	660	11	1	0	1	10:25:00	2014	Unidentified
Te16	2013-10-26	-15	1	4	16M01	13	660	11	1	1	0	10:38:00	2014	Pinus halepensis
Te16	2013-10-26	-15	1	4	16M01	13	660	11	1	0	1	11:03:00	2014	Unidentified
Te16	2013-10-26	-15	1	4	16M01	13	660	11	1	0	1	17:10:00	2014	Unidentified
Te16	2013-10-26	-15	1	4	16M01	13	660	11	1	0	1	17:32:00	2014	Unidentified
Te16	2013-10-26	-15	1	4	16M01	13	660	11	1	1	0	17:40:00	2014	Pinus halepensis
Te16	2013-10-26	-15	2	4	16H01	14	660	11	1	0	1	10:12:00	2014	Unidentified
Te16	2013-10-26	-15	2	4	16H01	14	660	11	1	0	1	10:19:00	2014	Unidentified
Te16	2013-10-26	-15	2	4	16H01	14	660	11	1	1	0	10:38:00	2014	Pinus halepensis
Te16	2013-10-26	-15	2	4	16H01	14	660	11	1	0	1	17:12:00	2014	Unidentified
Te16	2013-11-14	-13	1	4	16M01	13	660	11	1	1	0	09:17:00	2014	Pinus halepensis
Te16	2013-11-14	-13	1	4	16M01	13	660	11	1	0	1	09:20:00	2014	Unidentified
Te16	2013-11-14	-13	1	4	16M01	13	660	11	1	0	1	09:24:00	2014	Unidentified
Te16	2013-11-14	-13	1	4	16M01	13	660	11	1	1	0	09:25:00	2014	Pinus halepensis
Te16	2013-11-14	-13	1	4	16M01	13	660	11	1	0	1	10:04:00	2014	Unidentified
Te16	2013-11-14	-13	1	4	16M01	13	660	11	1	1	0	10:05:00	2014	Pinus halepensis
Te16	2013-11-14	-13	1	4	16M01	13	660	11	1	0	1	16:34:00	2014	Unidentified
Te16	2013-11-14	-13	1	4	16M01	13	660	11	1	1	0	16:41:00	2014	Pinus halepensis
Te16	2013-11-14	-13	1	4	16M01	13	660	11	1	1	0	16:45:00	2014	Pinus halepensis
Te16	2013-11-14	-13	2	4	16H01	14	660	11	1	1	0	09:19:00	2014	Pinus halepensis
Te16	2013-11-14	-13	2	4	16H01	14	660	11	1	0	1	10:01:00	2014	Unidentified
Te16	2013-11-14	-13	2	4	16H01	14	660	11	1	0	1	10:03:00	2014	Unidentified
Te16	2013-11-14	-13	2	4	16H01	14	660	11	1	0	1	16:32:00	2014	Unidentified
Te16	2013-11-14	-13	2	4	16H01	14	660	11	1	1	0	16:37:00	2014	Pinus halepensis
Te16	2013-11-14	-13	2	4	16H01	14	660	11	1	1	0	16:43:00	2014	Pinus halepensis
Te16	2013-11-14	-13	2	4	16H01	14	660	11	1	1	0	16:45:00	2014	Pinus halepensis
Te16	2013-11-14	-13	2	4	16H01	14	660	11	1	1	0	16:51:00	2014	Pinus halepensis
Te16	2013-11-14	-13	2	4	16H01	14	660	11	1	1	0	16:56:00	2014	Pinus halepensis
Te16	2013-11-21	-12	1	3	16M01	13	660	11	1	1	0	10:31:00	2014	Pinus halepensis
Te16	2013-11-21	-12	1	3	16M01	13	660	11	1	0	1	16:49:00	2014	Unidentified
Te16	2013-11-21	-12	2	3	16H01	14	660	11	1	0	1	10:29:00	2014	Unidentified
Te16	2013-11-21	-12	2	3	16H01	14	660	11	1	1	0	16:42:00	2014	Pinus halepensis
Te16	2013-12-26	-7	1	2	16M01	13	660	11	1	1	0	09:46:00	2014	Pinus halepensis
Te16	2013-12-26	-7	1	2	16M01	13	660	11	1	1	0	09:52:00	2014	Pinus halepensis
Te16	2013-12-26	-7	1	2	16M01	13	660	11	1	0	1	10:01:00	2014	Unidentified
Te16	2013-12-26	-7	1	2	16M01	13	660	11	1	0	1	10:02:00	2014	Unidentified
Te16	2013-12-26	-7	1	2	16M01	13	660	11	1	1	0	10:14:00	2014	Pinus halepensis
Te16	2013-12-26	-7	1	2	16M01	13	660	11	1	0	1	16:49:00	2014	Unidentified
Te16	2013-12-26	-7	1	2	16M01	13	660	11	1	1	0	16:53:00	2014	Pinus halepensis
Te16	2013-12-26	-7	1	2	16M01	13	660	11	1	1	0	16:59:00	2014	Pinus halepensis
Te16	2013-12-26	-7	1	2	16M01	13	660	11	1	1	0	17:01:00	2014	Pinus halepensis
Te16	2013-12-26	-7	2	2	16H01	14	660	11	1	1	0	09:50:00	2014	Pinus halepensis
Te16	2013-12-26	-7	2	2	16H01	14	660	11	1	1	0	09:53:00	2014	Pinus halepensis
Te16	2013-12-26	-7	2	2	16H01	14	660	11	1	1	0	10:12:00	2014	Pinus halepensis
Te16	2013-12-26	-7	2	2	16H01	14	660	11	1	0	1	10:16:00	2014	Unidentified
Te16	2013-12-26	-7	2	2	16H01	14	660	11	1	1	0	16:44:00	2014	Pinus halepensis
Te16	2014-01-08	-5	1	2	16M01	13	600	10	1	1	0	10:02:00	2014	Pinus halepensis
Te16	2014-01-08	-5	1	2	16M01	13	600	10	1	0	1	10:05:00	2014	Unidentified
Te16	2014-01-08	-5	1	2	16M01	13	600	10	1	1	0	10:06:00	2014	Pinus halepensis
Te16	2014-01-08	-5	1	2	16M01	13	600	10	1	0	1	10:09:00	2014	Unidentified
Te16	2014-01-08	-5	1	2	16M01	13	600	10	1	1	0	16:11:00	2014	Pinus halepensis
Te16	2014-01-08	-5	1	2	16M01	13	600	10	1	1	0	16:18:00	2014	Pinus halepensis
Te16	2014-01-08	-5	1	2	16M01	13	600	10	1	1	0	16:21:00	2014	Pinus halepensis
Te16	2014-01-08	-5	1	2	16M01	13	600	10	1	1	0	16:23:00	2014	Pinus halepensis
Te16	2014-01-08	-5	2	2	16H01	14	600	10	1	1	0	10:00:00	2014	Pinus halepensis
Te16	2014-01-08	-5	2	2	16H01	14	600	10	1	0	1	16:08:00	2014	Unidentified
Te16	2014-01-08	-5	2	2	16H01	14	600	10	1	0	1	16:11:00	2014	Unidentified
Te16	2014-01-08	-5	2	2	16H01	14	600	10	1	1	0	16:14:00	2014	Pinus halepensis
Te16	2014-01-16	-4	1	1	16M01	13	600	10	1	1	0	11:37:00	2014	Pinus halepensis
Te16	2014-01-16	-4	1	1	16M01	13	600	10	1	1	0	11:38:00	2014	Pinus halepensis
Te16	2014-01-16	-4	1	1	16M01	13	600	10	1	0	1	11:40:00	2014	Unidentified
Te16	2014-01-16	-4	1	1	16M01	13	600	10	1	0	1	16:23:00	2014	Unidentified
Te16	2014-01-16	-4	1	1	16M01	13	600	10	1	1	0	16:24:00	2014	Pinus halepensis
Te16	2014-01-16	-4	1	1	16M01	13	600	10	1	1	0	16:29:00	2014	Pinus halepensis
Te16	2014-01-16	-4	1	1	16M01	13	600	10	1	1	0	16:33:00	2014	Pinus halepensis
Te16	2014-01-16	-4	1	1	16M01	13	600	10	1	1	0	16:34:00	2014	Pinus halepensis
Te16	2014-01-16	-4	1	1	16M01	13	600	10	1	1	0	17:09:00	2014	Pinus halepensis
Te16	2014-01-16	-4	1	1	16M01	13	600	10	1	1	0	17:11:00	2014	Pinus halepensis
Te16	2014-01-16	-4	1	1	16M01	13	600	10	1	1	0	17:15:00	2014	Pinus halepensis
Te16	2014-01-16	-4	1	1	16M01	13	600	10	1	1	0	17:19:00	2014	Pinus halepensis
Te16	2014-01-16	-4	2	1	16H01	14	600	10	1	0	1	11:36:00	2014	Unidentified
Te16	2014-01-16	-4	2	1	16H01	14	600	10	1	1	0	16:24:00	2014	Pinus halepensis
Te16	2014-01-16	-4	2	1	16H01	14	600	10	1	1	0	16:25:00	2014	Pinus halepensis
Te16	2014-01-16	-4	2	1	16H01	14	600	10	1	1	0	16:28:00	2014	Pinus halepensis
Te16	2014-01-16	-4	2	1	16H01	14	600	10	1	1	0	16:32:00	2014	Pinus halepensis
Te16	2014-01-16	-4	2	1	16H01	14	600	10	1	1	0	17:12:00	2014	Pinus halepensis
Te16	2014-01-23	-3	1	1	16M01	13	600	10	1	1	0	09:11:00	2014	Pinus halepensis
Te16	2014-01-23	-3	1	1	16M01	13	600	10	1	1	0	09:19:00	2014	Pinus halepensis
Te16	2014-01-23	-3	2	1	16H01	14	600	10	1	1	0	09:12:00	2014	Pinus halepensis
Te16	2014-01-23	-3	2	1	16H01	14	600	10	1	1	0	09:15:00	2014	Pinus halepensis

## Sheet: Acronym
Acronym	Description
TERRI	The identity of the territory monitored
WEEK	Number of weeks before egg-laying until the week of the onset of laying
SEX	Individual sex (male/female)
COUP	Month-long time-periods (1 October; 2 November; 3 December; 4 January)
IND	The identity of the individual involved
EXPER	Number of consecutive years that an individual occupies the same territory
CONTROL	Minutes of observation
CONTROH	Hours of observation
NESTMAT	Number total of material supplied to the nest per day
FRESH	Number of fresh material supplied to the nest per day
HARD	Number of hard material supplied to the nest per day
CHICKS	Number of eaglets fledged (0-2)
BQI	Number of eaglets fledged for a particular individual/territory (0–2 fledgling/year) / the average number of eaglets in the monitored territories in the same year
YEAR	Year of observation
HOUR	Hour of observation
SPECIES	Plant species supplied to the nest
DATE	Observation date
